# Supplementary material for: Clonal germinal center B cells function as a niche for T-cell lymphoma
Source: PubMed Central journal article supplement — Blood. 2022 Aug 5;140(18):1937–50. doi: 10.1182/blood.2022015451 (PMC10653021; doi:10.1182/blood.2022015451), 2022-08-05
Supplement: BLOOD_BLD-2022-015451-mmc2.pdf [file BLOOD_BLD-2022-015451-mmc2.pdf]

## SUPPLEMENTAL DATA

### **Clonal germinal center B cells function as a niche for T-cell lymphoma**

Manabu Fujisawa<sup>1</sup>, Tran B. Nguyen<sup>1</sup>, Yoshiaki Abe<sup>2</sup>, Yasuhito Suehara<sup>3</sup>, Kota Fukumoto<sup>1,3</sup>,  
Sakurako Suma<sup>2</sup>, Kenichi Makishima<sup>2</sup>, Chihiro Kaneko<sup>1</sup>, Yen T. M. Nguyen<sup>1</sup>, Kensuke Usuki<sup>4</sup>,  
Kentaro Narita<sup>5</sup>, Kosei Matsue<sup>5</sup>, Naoya Nakamura<sup>6</sup>, Shumpei Ishikawa<sup>7</sup>, Fumihito Miura<sup>8</sup>,  
Takashi Ito<sup>8</sup>, Ayako Suzuki<sup>9</sup>, Yutaka Suzuki<sup>9</sup>, Seiya Mizuno<sup>10</sup>, Satoru Takahashi<sup>10</sup>, Shigeru  
Chiba<sup>1,3\*</sup> and Mamiko Sakata-Yanagimoto<sup>1,3,11\*</sup>

<sup>1</sup>*Department of Hematology, Faculty of Medicine, University of Tsukuba.*

<sup>2</sup>*Department of Hematology, Graduate School of Comprehensive Human Sciences, University of  
Tsukuba.*

<sup>3</sup>*Department of Hematology, University of Tsukuba Hospital.*

<sup>4</sup>*Department of Hematology, NTT Medical Center Tokyo.*

<sup>5</sup>*Division of Hematology/Oncology, Department of Internal Medicine, Kameda Medical Center.*

<sup>6</sup>*Department of Pathology, Tokai University School of Medicine.*

<sup>7</sup>*Department of Preventive Medicine, Graduate School of Medicine, The University of Tokyo.*

<sup>8</sup>*Department of Biochemistry, Kyushu University Graduate School of Medical Sciences.*

<sup>9</sup>*Department of Computational Biology and Medical Sciences, Graduate School of Frontier Sciences, The University of Tokyo.*

<sup>10</sup>*Laboratory Animal Resource Center in Transborder Medical Research Center, Faculty of Medicine, University of Tsukuba.*

<sup>11</sup>*Division of Advanced Hemato-Oncology, Transborder Medical Research Center, University of Tsukuba.*

\* These authors contributed equally to this work

Correspondence: sakatama@md.tsukuba.ac.jp (M.S.-Y.), schiba-t@md.tsukuba.ac.jp (S.C.)

Department of Hematology, Faculty of Medicine, University of Tsukuba

1-1-1 Tennodai, Tsukuba, Ibaraki 305-8575, Japan

Tel: +81-29-853-3127; Fax: +81-29-853-8079

1 **Supplemental Notes**

2 **Supplemental Note1**

3 **Related to “Clonal expansion of *Tet2*-deficient GCB cells sorted from tumor-bearing**

4 **MxTR”**

5 To explore the biological significance of core histone mutations (c.G>A260 (p.Ser87Asn,  
6 H3S87N) mutations of canonical paralog *histone H3* genes) in clonally evolved B cells, we  
7 established knock-in mice (H3S87N KI) in which the Hist1h3c S87N mutant was inserted on  
8 the 3' UTR of the *Ighg1* promoter (supplemental Figure 9A–B). We confirmed the expression of  
9 H3S87N KI (supplemental Figure 9C). We observed H3S87N KI and wild-type mice under  
10 stimulation with sheep red blood cells every 4 weeks. Interestingly, at 15 weeks, the spleen of  
11 H3S87N KI was heavier than that of the wild type, accompanied by expanded follicular  
12 structures (supplemental Figure 9D–F). Furthermore, the percentages and number of GCB cells  
13 were significantly increased in the spleen of H3S87N KI compared to those of the wild type,  
14 whereas those of follicular B cells to marginal zone B cells were significantly increased in the  
15 spleen of H3S87N KI (supplemental Figure 9G). Cd40 expression on GCB cells collected from  
16 the spleen of H3S87N KI was higher than that in control mice (supplemental Figure 9H). These  
17 results suggest that core histone mutations acquired during clonal evolution contribute to  
18 expansion of GCB cells.

19

20 **Supplemental Note2**

21 **Related to “Identification of the Cd40–Cd40lg interaction between GCB and T<sub>FH</sub>-tumor cell**  
22 **clusters as a therapeutic target in T<sub>FH</sub>-like lymphomas”**

23 To explore the biological roles of CD40LG signaling in T cells, we performed whole-  
24 transcriptome analysis (WTA) using RNA extracted from Jurkat cells expressing the G17V mutant  
25 or mock (Jurkat<sup>G17VRHOA</sup> and Jurkat<sup>mock</sup>) respectively<sup>1</sup>, with or without stimulation by CD40-Fc  
26 chimera protein under stimulation by an anti-CD3 antibody: (1) Jurkat<sup>mock</sup> stimulated by anti-Cd3  
27 antibody (Mock\_CD3, n = 4), (2) Jurkat<sup>mock</sup> stimulated by anti-CD3 antibody and CD40-FC  
28 chimera (Mock\_CD3<sup>+</sup>CD40<sup>FC</sup>, n = 4), (3) Jurkat<sup>G17VRHOA</sup> stimulated by anti-CD3 antibody  
29 (G17V\_CD3<sup>+</sup>, n = 4), and (4) Jurkat<sup>G17VRHOA</sup> stimulated by anti-CD3 antibody and Cd40-FC  
30 chimera (G17V\_CD3<sup>+</sup>CD40<sup>FC</sup>, n = 4, supplemental Figure 11A). Principal component analysis  
31 revealed a distinct gene-expression pattern in each group (supplemental Figure 11B). We  
32 identified 341 differentially expressed genes (DEGs) between the G17V\_CD3<sup>+</sup>CD40<sup>FC</sup> and  
33 G17VRHOA\_CD3<sup>+</sup> groups (up, n = 124; down, n = 217; supplemental Figure 11C–D), including  
34 oncogenic genes, such as *CDK6*, *TCF7*, and *VEGFA*. GSEA for WTA data showed that among  
35 hallmark and C6 oncogenic gene sets from MsigDB, 3 and 17 pathways were significantly  
36 enriched in the G17V\_CD3<sup>+</sup>CD40<sup>FC</sup> group compared with the G17VRHOA\_CD3<sup>+</sup> group,



37 respectively. Among them, gene sets involved in mTOR, IL2 STAT5, and interferon gamma  
38 response signaling were enriched in the G17V\_CD3<sup>+</sup>CD40<sup>FC</sup> group (supplemental Figure 11E–  
39 H). Furthermore, ingenuity pathway analysis (IPA) confirmed the enrichment of mTOR and  
40 VEGF signaling in the G17V\_CD3<sup>+</sup>CD40<sup>FC</sup> group (supplemental Figure 11I).

41           Furthermore, to explore the effect of G17V *RHOA* mutation on CD40LG signaling in T  
42 cells, the G17V\_CD3<sup>+</sup>CD40<sup>FC</sup> group was compared with Mock\_CD3<sup>+</sup>CD40<sup>FC</sup>. GSEA for RNA-  
43 seq showed that 16 pathways were enriched in G17V\_CD3<sup>+</sup>CD40<sup>FC</sup> compared with Mock\_CD3<sup>+</sup>.  
44 Notably, five pathways, including TNFA SIGNALING VIA NFKB and HEDGEHOG  
45 SIGNALING, were enriched only in G17V\_CD3<sup>+</sup>CD40<sup>FC</sup> vs Mock\_CD3<sup>+</sup>CD40<sup>FC</sup>, while  
46 enrichment of the other 11 pathways was also observed in G17V\_CD3<sup>+</sup> vs Mock\_CD3<sup>+</sup>  
47 (supplemental Figure 11J). Overall, these results suggest that CD40LG signaling in T cells  
48 stimulated by CD40 activates oncogenic pathways, such as the mTOR pathway, and contributes  
49 to tumorigenesis.

50

51 **Supplemental Methods**

52 **Mouse genotyping**

53 Genotyping and evaluation were performed using genomic DNA extracted from either tails  
54 (genotyping) using genomic PCR with the primers listed in supplemental Table 9.<sup>2,3</sup> This  
55 research was approved by the facility review committee (Approval number, 21-005). All strains  
56 were bred and housed under specific pathogen-free conditions. All animal experiments were  
57 performed according to the guidelines.

58

59 **Human samples**

60 Homeostatic lymph node (HLN) samples were prospectively collected from patients with solid  
61 tumors (n = 3) who had undergone lymph node (LN) resection between January and June 2020.  
62 LNs with no enlargement (< 1 cm) were used in this study. The collected LNs were confirmed  
63 to be negative for pan-cytokeratin using flow cytometry. Angioimmunoblastic T-cell lymphoma  
64 (AITL) samples (n = 6) were prospectively collected between March 2019 and July 2020.  
65 Lymphoma specimens were diagnosed by hematopathologists. Clinical characteristics of  
66 patients with HLN and AITL are listed in supplemental Table 10. This study was conducted in  
67 accordance with the Declaration of Helsinki and was approved by the review board of each

68 institution (Approval numbers, H24-075 and R01-209). Written informed consent was obtained  
69 from all participating patients.

70

#### 71 **Flow cytometric analysis**

72 Mouse spleen tissue and LNs or human AITL LNs were manually minced and passed through a  
73 70  $\mu\text{m}$  cell strainer (Falcon) to prepare single-cell suspensions. The suspensions were dissolved  
74 in ammonium-potassium chloride buffer to remove red blood cells (RBCs). Multicolor flow  
75 cytometric analyses and sorting were performed on a BD FACS Aria II or Aria III sorter (BD  
76 Biosciences). FlowJo software (Tree Star Inc.) was used for all flow cytometric analyses.

77

#### 78 **Cell sorting**

79  $\text{Cd19}^+\text{B220}^+\text{Fas}^+\text{Gl-7}^+\text{Cd138}^-$  GCB cells,  $\text{Cd19}^+\text{B220}^+\text{Fas}^-\text{Gl-7}^-\text{Cd138}^-$  B cells excluding GCB  
80 cells (non-GCB cells), and  $\text{Cd4}^+\text{Cd8}^-\text{Pdc1}^+\text{Icos}^+$   $\text{T}_{\text{FH}}$  cells were sorted from the spleen of  
81 MxTR. The purity of these preparations was  $> 95\%$ . All antibodies used are listed in  
82 supplemental Table 11.

83

#### 84 **Transplantation of cell fractions isolated from the spleen of tumor-bearing MxTR**

85 Cd4<sup>+</sup> cells, B220<sup>+</sup> cells, and Cd11b<sup>+</sup> cells were isolated from the spleens of tumor-bearing  
86 MxTR using MACS beads (Cd4 [L3T4] MicroBeads, cat # 130-117-043; CD45R [B220]  
87 MicroBeads, cat # 1130-049-501; and Cd11b MicroBeads, cat # 130-049-601; Miltenyi Biotec),  
88 according to the manufacturer's instructions. After elution in MACS buffer, each single-cell  
89 suspension was resuspended in RPMI-1640 Medium (RPMI, Sigma-Aldrich; concentration, 1 ×  
90 10<sup>7</sup> cells /mL). The cells in each fraction were mixed in 2 × 10<sup>6</sup> cells (200 μL). Ultimately, four  
91 suspensions were prepared; (i) Cd4<sup>+</sup> (T), B220<sup>+</sup> (B), and Cd11b<sup>+</sup> cells (M); (ii) T and B; (iii) T  
92 and M; (iv) T. In addition, no injection (v) and single-cell suspensions (2 × 10<sup>7</sup> cells) from the  
93 spleen or LN of MxTR (vi) were prepared as positive and negative controls, respectively. Each  
94 suspension was injected intraperitoneally into 5-week-old male nude mice (Charles River  
95 Laboratory) irradiated with 2 Gy before infusion (supplemental Figure 2A). The nude mice used  
96 in the experiment were housed under specific pathogen-free conditions. The donor H2kb (MHC  
97 class I alloantigen from C57BL/6 mice) and the recipient H2kd (MHC class I alloantigen from  
98 nude mice) in mononuclear cells of peripheral blood (PB) were used to identify the chimeras.  
99 Chimerism of PB was checked on day 28 after transplantation. Successful engraftment was  
100 defined as macroscopic splenomegaly and LN enlargement, and ≥ 1% of donor-derived  
101 Cd4<sup>+</sup>H2kb<sup>+</sup> cells in the mononuclear cells of PB.

102

103 **Transplantation of GCB and T<sub>FH</sub> cells isolated from tumor-bearing MxTR**

104 GCB, non-GCB, and T<sub>FH</sub> cells were sorted from the spleens of tumor-bearing MxTR. each single-  
105 cell suspension was resuspended in RPMI. The cells in each fraction were mixed in  $2 \times 10^5$  cells  
106 (200  $\mu$ L). Three types of mixed cells, i.e., (i) T<sub>FH</sub> and GCB cells, (ii) T<sub>FH</sub> and non-GCB cells, (iii)  
107 T<sub>FH</sub> cells only, were injected intraperitoneally into 5-week-old male nude mice, which were  
108 treated with anti-asialo GM antibody (FUJIFILM) intraperitoneally, immediately prior to cell  
109 injection.<sup>4</sup> Nude mice were irradiated with 4 Gy, before injection. On day 7 after injection,  
110 chimerism in the spleen was assessed under the same conditions as before.

111

112 **Antibody treatment**

113 Single-cell suspensions ( $2 \times 10^7$  cells) prepared from spleen tissues of tumor-bearing MxTR  
114 were injected intraperitoneally into 5-week-old nude mice, irradiated with 2 Gy. Anti-Cd40lg  
115 antibody or Armenian hamster IgG isotype control (both from Bio X cell; 250  $\mu$ g/mL prepared  
116 in PBS) was injected intraperitoneally every other day starting on day 0.

117

118 **Immunofluorescence of mouse samples**

119 Spleen tissues obtained from MxTR and MxWT were embedded in OCT (Sakura Finetek Japan  
120 Co.), immediately frozen in hexane cooled with dry ice, and stored at  $-80$  °C. The spleen and

121 LNs were sectioned at a thickness of 2  $\mu\text{m}$  on a cryostat at  $-16\text{ }^{\circ}\text{C}$ . Sections were dried for 1 h  
122 at  $25\text{ }^{\circ}\text{C}$ , fixed for 10 min in 4% paraformaldehyde, permeabilized for 10 min with 0.1% Triton  
123 X-100, and blocked with 10% goat serum (Sigma-Aldrich) prepared in PBS for 30 min.  
124 Sections were stained overnight at  $4\text{ }^{\circ}\text{C}$  with the primary antibodies. After three washes,  
125 sections were stained for 1 h at  $25\text{ }^{\circ}\text{C}$  with the following secondary antibodies: AF488-goat-  
126 anti-rabbit IgG (Thermo Fisher Scientific) and AF594-goat-anti-rat IgG (Thermo Fisher  
127 Scientific). Potential tissue autofluorescence was quenched using the True VIEW  
128 Autofluorescence Quenching Kit (Vector Laboratories). After incubation with 4',6-diamidino-2-  
129 phenylindole (DAPI, Vectashield Mounting Medium; Vector Laboratories), the samples were  
130 imaged using a Leica TCS SP5 confocal laser scanning microscope (Leica Microsystems).

131

### 132 **CD40LG stimulation**

133 Jurkat cells inducibly expressing G17V RHOA mutant complementary DNA (cDNA)  
134 (Jurkat<sup>G17VRHOA</sup>) and mock-transduced cells (Jurkat<sup>mock</sup>) have been previously described<sup>1</sup>. Jurkat  
135 cells were cultured at  $37\text{ }^{\circ}\text{C}$  in RPMI supplemented with 10% fetal calf serum and 1% penicillin  
136 streptomycin. Twenty-four hours after induction with doxycycline 2  $\mu\text{g}/\text{mL}$ , each  
137 indicated Jurkat line was rested for 4 hours in serum-free media. Cells were then  
138 collected and stimulated with recombinant human CD40/TNFRSF5-Fc chimeric protein

139 (R&D) or recombinant human IgG1 Fc protein (R&D) under the stimulation 2 ug/mL  
140 LEAF<sup>TM</sup> purified anti-human CD3 antibody (BioLegend) for 24h at 37°C. The collected  
141 cells were subjected to RNA-seq according to the protocols described.

142

143 **Single-cell RNA sequencing (scRNA-seq) library preparation and sequencing for mouse**  
144 **samples**

145 To examine immune cell profiles, Red-blood-cell (RBC)-free single-cell suspensions from the  
146 spleen of tumor-bearing MxTR (n = 2, MxTR1 and MxTR2) or MxWT (n = 2, MxWT1 and  
147 MxWT2) were converted into barcoded scRNA-seq libraries using Chromium Single Cell 3'  
148 Reagent kits (10x Genomics, version 3.1), according to the manufacturer's instructions  
149 (CG000183 Rev A), aiming for ~5,000 cells per library. All libraries were subjected to quality  
150 control checks and quantified using the 2100 Bioanalyzer High Sensitivity DNA Kit (Agilent  
151 Technologies). The library information for each sample is listed in supplemental Table 12.  
152 Libraries were sequenced on the Illumina HiSeqX platform.

153

154 **scRNA-seq initial analysis**

155 Regarding scRNA-seq data analysis, *Cell Ranger* pipelines (10x Genomics, version 3.1.0) were  
156 used to demultiplex raw data and to generate a matrix file of the features using barcodes. Matrix

157 data were analyzed with R using the R package *Seurat* v 3.1.0<sup>5</sup> on R Studio. Standard quality  
158 control check was performed to remove cells with few genes or overexpression of mitochondrial  
159 gene reads. Data normalization was performed using the “NormalizeData” function, and highly  
160 variable features were extracted using the “FindVariableFeatures” function. Normalized data  
161 were subjected to linear transformation (scaling) and principal component analysis (PCA),  
162 based on variable features using the “ScaleData” and the “RunPCA” function. Graph-based  
163 clustering of gene expression profiles was performed using the “FindNeighbors” and  
164 “FindClusters” functions with default parameters. Nonlinear dimensionality reduction UMAP  
165 with “RunUMAP” and “DimPlot” functions were used for visualization. In addition, the cell  
166 clusters were annotated based on the expression of canonical markers, such as *Gzma*, *Cxcr3*,  
167 and *Dapl1* for Cd8 T cells; *Ccl3*, *Cd28*, and *Pdcd1* for Cd4 T cells; *Ighd*, *Icosl*, *Cr2*, *Parm1*,  
168 *Cd83*, and *Prdm1* for B cells; and *Adgre1*, *Ifitm3*, and *S100a9* for myeloid cells.

169

#### 170 **Data integration for scRNA-seq and batch correction**

171 Canonical correlation analysis (CCA) was performed to identify shared sources of variation  
172 across multiple datasets using the “FindIntegrationAnchors” function.<sup>5</sup> Four datasets (data from  
173 spleen cells of MxTR [n = 2] and MxWT [n = 2] mice) were integrated using the anchors by the



174 “IntegrateData” function with canonical correlation dimensions of 20. Integrated data were  
175 scaled and subjected to PCA as described above.

176

### 177 **scRNA-seq of human samples**

178 Two of the 5 AITL samples (AITL1 and AITL2) and the 3 HLN samples (HLN1, HLN2, and  
179 HLN3) were converted into barcoded scRNA-seq libraries using Chromium Single Cell 3’  
180 Reagent kits, and 3 of the 5 AITL samples (AITL3, AITL4, and AITL5) were converted using  
181 Chromium Single Cell 5’ Reagent kits (10x Genomics, version 1.1). *Cell Ranger* pipelines were  
182 used to demultiplex raw data and to generate a matrix file of the features using barcodes. Eight  
183 datasets (data from AITL [n = 5] and HLN [n = 3]) were integrated using anchors by the  
184 “IntegrateData” function with canonical correlation dimensions of 20. Quality control and PCA  
185 were performed using the same strategy employed for the scRNA-seq analysis of mice.

186

### 187 **Gene set variation analysis (GSVA) of scRNA-seq data**

188 Significantly enriched pathways for scRNA-seq data were analyzed using the *GSVA* ver. 1.38.0.<sup>6</sup>  
189 The average gene expression data of each cluster were analyzed, and the activity scores for each  
190 cluster were compared using a generalized linear model (GLM). GLM output was visualized via  
191 heatmaps, which were constructed using the R package *heatmap3*<sup>7</sup>.

192

### 193 **Differentially expressed gene (DEG) analysis of scRNA-seq**

194 DEG analysis between MxTR vs MxWT or AITL vs HLN was performed in each cluster using  
195 “FindMarkers” or “FindAllMarkers” functions as appropriate, with a minimum percentage of  
196 gene-expressing cells set to 20%; the minimum log fold-change in gene expression in each  
197 cluster, in comparison to that in all the other clusters was set to 0.25. DEGs were defined as  
198 genes with an adjusted  $p$ -value  $< 0.05$ . The results of the Wilcoxon rank-sum test were used to  
199 construct the DEG lists and volcano plots. Volcano plots were plotted using the R package  
200 *ggplot2*.

201 To identify pathways significantly enriched in each group, *Gene Set Enrichment*  
202 *Analysis* (GSEA 4.1.0, <https://www.gsea-msigdb.org/gsea/index.jsp>) and *Metascape*  
203 (<https://metascape.org/gp/index.html#/main/step1>) were used.

204

### 205 **Cell–cell interaction analysis of scRNA-seq data**

206 We analyzed cell–cell interactions between immune cell clusters and T<sub>FH</sub>-tumor cell cluster  
207 using the *CellPhoneDB* package,<sup>8</sup> a manually curated repository of ligands, receptors, and their  
208 interactions, integrated with a statistical framework for inferring intercellular interactions from  
209 single-cell transcriptomes.<sup>9</sup> Briefly, potential ligand–receptor interactions were statistically

210 selected based on the expression of a receptor gene in a lineage subpopulation and a ligand gene  
211 in another. We only considered genes expressed in > 20% of cells in any given subpopulation.  
212 We permuted the cluster labels of all input cells 1,000 times and calculated the mean interaction  
213 score (the average receptor expression level in a subpopulation multiplied by the average ligand  
214 expression level in the interacting subpopulation), generating a null distribution of the mean  
215 interaction score for each ligand–receptor pair in each pairwise comparison across  
216 subpopulations. We located observed mean interaction scores that were the same or higher than  
217 the actual mean score in the null distribution. We calculated the proportion of the observed  
218 scores, conferring a *p*-value for the likelihood of specificity of a given ligand–receptor complex  
219 to a given cluster pair.

220

### 221 **RNA sequencing (RNA-seq)**

222 GCB cells were isolated from the spleens of tumor-bearing MxTR (n = 4) or MxWT (n = 3)  
223 mice. Total RNA was extracted using the RNeasy Mini Kit (Qiagen). RNA integrity number  
224 (RIN) values were analyzed using the Agilent 2100 Bioanalyzer (Agilent Technologies);  
225 samples with an RIN > 8 were used in subsequent analyses. Libraries were prepared using a  
226 SMARTer Stranded Total RNA-seq Kit v2—Pico Input Mammalian (Takara Bio Inc.) or a  
227 TruSeq RNA Sample Preparation Kit (illumina) according to the manufacturer’s instructions.

228 The concentration and size distribution of the libraries were assessed using an Agilent 2100  
229 Bioanalyzer (Agilent Technologies). Sequencing was performed using the Illumina HiSeq X  
230 platform with a standard 150 bp paired-end read protocol at Macrogen or Illumina NextSeq 500  
231 platform with a paired-end 36-base read option at Tsukuba i-Laboratory LLP (Ibaraki, Japan),  
232 and then analyzed using the CLC workbench version 9.5.1 (Qiagen). Sequencing reads were  
233 trimmed to remove adapter sequences from the 3' ends of reads, mapped onto the reference  
234 genome (GRCm38), and quantified. For each gene, reads per kilobase of exon per million  
235 mapped reads (RPKMs) were normalized, estimated as exons per kilobase, and filtered using  
236 the Empirical Analysis of Digital Gene Expression tool. DEG analysis and GSEA were  
237 analyzed using the protocol written in scRNAseq data analysis.

238 Raw data for RNA-seq data from GCB cells of Vav-Cre/Tet2<sup>-/-</sup> or Vav-Cre/Tet2<sup>+/+</sup>, and  
239 human diffuse large B-cell lymphoma (DLBCL) samples were downloaded from Gene  
240 Expression Omnibus (GSE111700)<sup>10</sup> and European Genome-Phenome Archive  
241 (EGAS00001002606)<sup>11</sup> and reanalyzed, respectively.

242

### 243 **Whole exome sequencing (WES)**

244 Genomic DNA was extracted using the QIAamp DNA Blood Mini Kit (Qiagen) from  $1 \times 10^5$   
245 GCB and T<sub>FH</sub> cells from the spleen of tumor-bearing MxTR (n = 6) or paired tail tissue as the

246 reference. Genomic DNA was extracted from the LNs of AITL patients (n = 5) and sorted four  
247 B-cell fractions (n = 2), including naïve B (IgD<sup>+</sup>CD19<sup>+</sup>CD138<sup>-</sup>), memory B (IgD<sup>-</sup>CD38<sup>-</sup>CD10<sup>-</sup>  
248 CD19<sup>+</sup>CD138<sup>-</sup>), GCB (IgD<sup>-</sup>CD38<sup>-</sup>CD10<sup>+</sup>CD19<sup>+</sup>CD138<sup>-</sup>), and plasma cell fractions  
249 (CD19<sup>dull</sup>CD138<sup>+</sup>) using a QIAamp DNA Blood Mini Kit. DNA integrity number (DIN) values  
250 were examined using Agilent TapeStation 2200 (Agilent Technologies); samples with a DIN  
251 number > 8 were included for subsequent analyses. Libraries were prepared from 100 ng  
252 genomic DNA sheared using a Covaris S220 sonicator (M&S Instruments Inc.). SureSelect XT  
253 Mouse All Exon kits (Agilent Technologies) were used for exon capture, according to the  
254 manufacturer's instructions for mouse DNA. Sequencing data were generated using a standard  
255 150 bp paired-end protocol on the Illumina HiSeq X or NovaSeq 6000 platform. Sequence  
256 alignment and mutation calling were performed using the *Genomon2* pipeline  
257 (<https://github.com/Genomon-Project>). The sequencing reads were mapped onto the reference  
258 genome (GRCm38). Putative somatic mutations with an EB call *p*-value > 2.0, and Fisher's  
259 exact *p*-value < 0.01 were considered. Mapping errors were excluded by visual inspection using  
260 *Integrative Genomics Viewer (IGV, version 2.6.2)*.<sup>12</sup>

261 Four genomic DNA samples from AITL were subjected to WES, using a protocol  
262 similar to that used for analyzing mice samples, using SureSelect XT Human All Exon kits  
263 (Agilent Technologies). GRCh38 was used as the reference genome.

264

265 **Immuno-profiling analysis using bulk RNA-seq and WES data**

266 The *MiXCR* algorithm<sup>13</sup> was used for immune profiling of bulk RNA-seq data of mouse GCB  
267 cells and WES data of mouse T<sub>FH</sub> and GCB cells. Then, we extracted hypervariable  
268 complementarity-determining region 3 (CDR3) sequences and the VDJ gene segment of the *T-*  
269 *cell receptor (TCR)* and *immunoglobulin (Ig)* genes. *TCR* and *Ig* sequences identified using  
270 *MiXCR* were analyzed using the R package, *LymphoSeq*,<sup>14</sup> and visualized.

271

272 **Whole-genome bisulfite sequencing (WGBS)**

273 GCB cells sorted from the spleens of tumor-bearing MxTR (n = 2) and MxWT (n = 2) mice  
274 were used for library preparation. Library preparation for WGBS was performed using the post-  
275 bisulfite adaptor tagging (PBAT) strategy.<sup>15</sup> Genomic DNA was extracted from 5,000 sorted  
276 cells using a QIAamp DNA Blood Mini Kit (Qiagen). The number of cells was limited; and  
277 therefore, the library was prepared without quantifying the DNA yield. Four-fifths of the  
278 volume of purified genomic DNA was spiked with 300 pg unmethylated lambda DNA  
279 (Promega) and used for bisulfite treatment using the EZ DNA methylation gold kit (Zymo  
280 Research). The tPBAT protocol was performed as described previously.<sup>16</sup> After library  
281 preparation, library yields were determined using the library quantification kit (Takara Bio Inc.).

282 Four cycles of PCR amplification were performed using PrimeStar Max DNA polymerase  
283 (Takara Bio Inc.), and the amplified libraries were sequenced on the Illumina HiSeq X platform  
284 at Macrogen. One quarter of the sequencing lanes were assigned per sample. Sequenced reads  
285 were analyzed as described previously.<sup>15</sup> The basic metrics of the methylome data are provided  
286 in supplemental Table 13.

287

#### 288 **Data Availability**

289 Sequencing files are deposited in the European Nucleotide Archive ERP138895 or the European  
290 Genome-phenome Archive EGAS00001006401.

291

#### 292 **Code Availability**

293 Scripts used for data analysis are available upon request.

294

295 **Supplemental Table Legends**

296 **Supplemental Table 1.** Top 50 markers highly expressed in each cluster

297 **Supplemental Table 2.** Hyper-DMRs in GCB cells from MxTR compared to those from MxWT

298 **Supplemental Table 3.** Hypo-DMRs in GCB cells from MxTR compared to those from MxWT

299 **Supplemental Table 4.** Clonotyping based on CDR3 sequences performed for Igh genes in RNA-  
300 seq data of MxTR1 and MxWT1

301 **Supplemental Table 5.** Somatic mutations detected by WES for T<sub>FH</sub> and GCB cells sorted from  
302 tumors of five MxTR

303 **Supplemental Table 6.** Somatic mutations detected by WES for the LNs of AITL patients and  
304 sorted four B-cell fractions

305 **Supplemental Table 7.** Differential expression genes from hB1–9 of scRNA-seq

306 **Supplemental Table 8.** Gene sets that characterize B cells, especially GCB cells

307 (A) GCB-related gene sets cited from Holmes et al.

308 (B) AITL-B-specific gene set

309 (C) T cell signature gene sets from Chung et al.

310 (D) T<sub>FH</sub>-tumor cell signatures from Nguyen et al.

311 (E) B cell signature gene sets from Chung et al.

312 **Supplemental Table 9.** Sequences of primers used in the study



313 **Supplemental Table 10.** Demographics and clinical and phenotypic characteristics of HLN and

314 AITL cohort

315 **Supplemental Table 11.** Antibodies used for flow cytometric analysis and immunofluorescence

316 staining

317 **Supplemental Table 12.** Sequencing metrics for the study cohort as determined by *Cell*

318 *Ranger*

319 **Supplemental Table 13.** Basic statistics of methylome data

320

Supplemental Figure 1

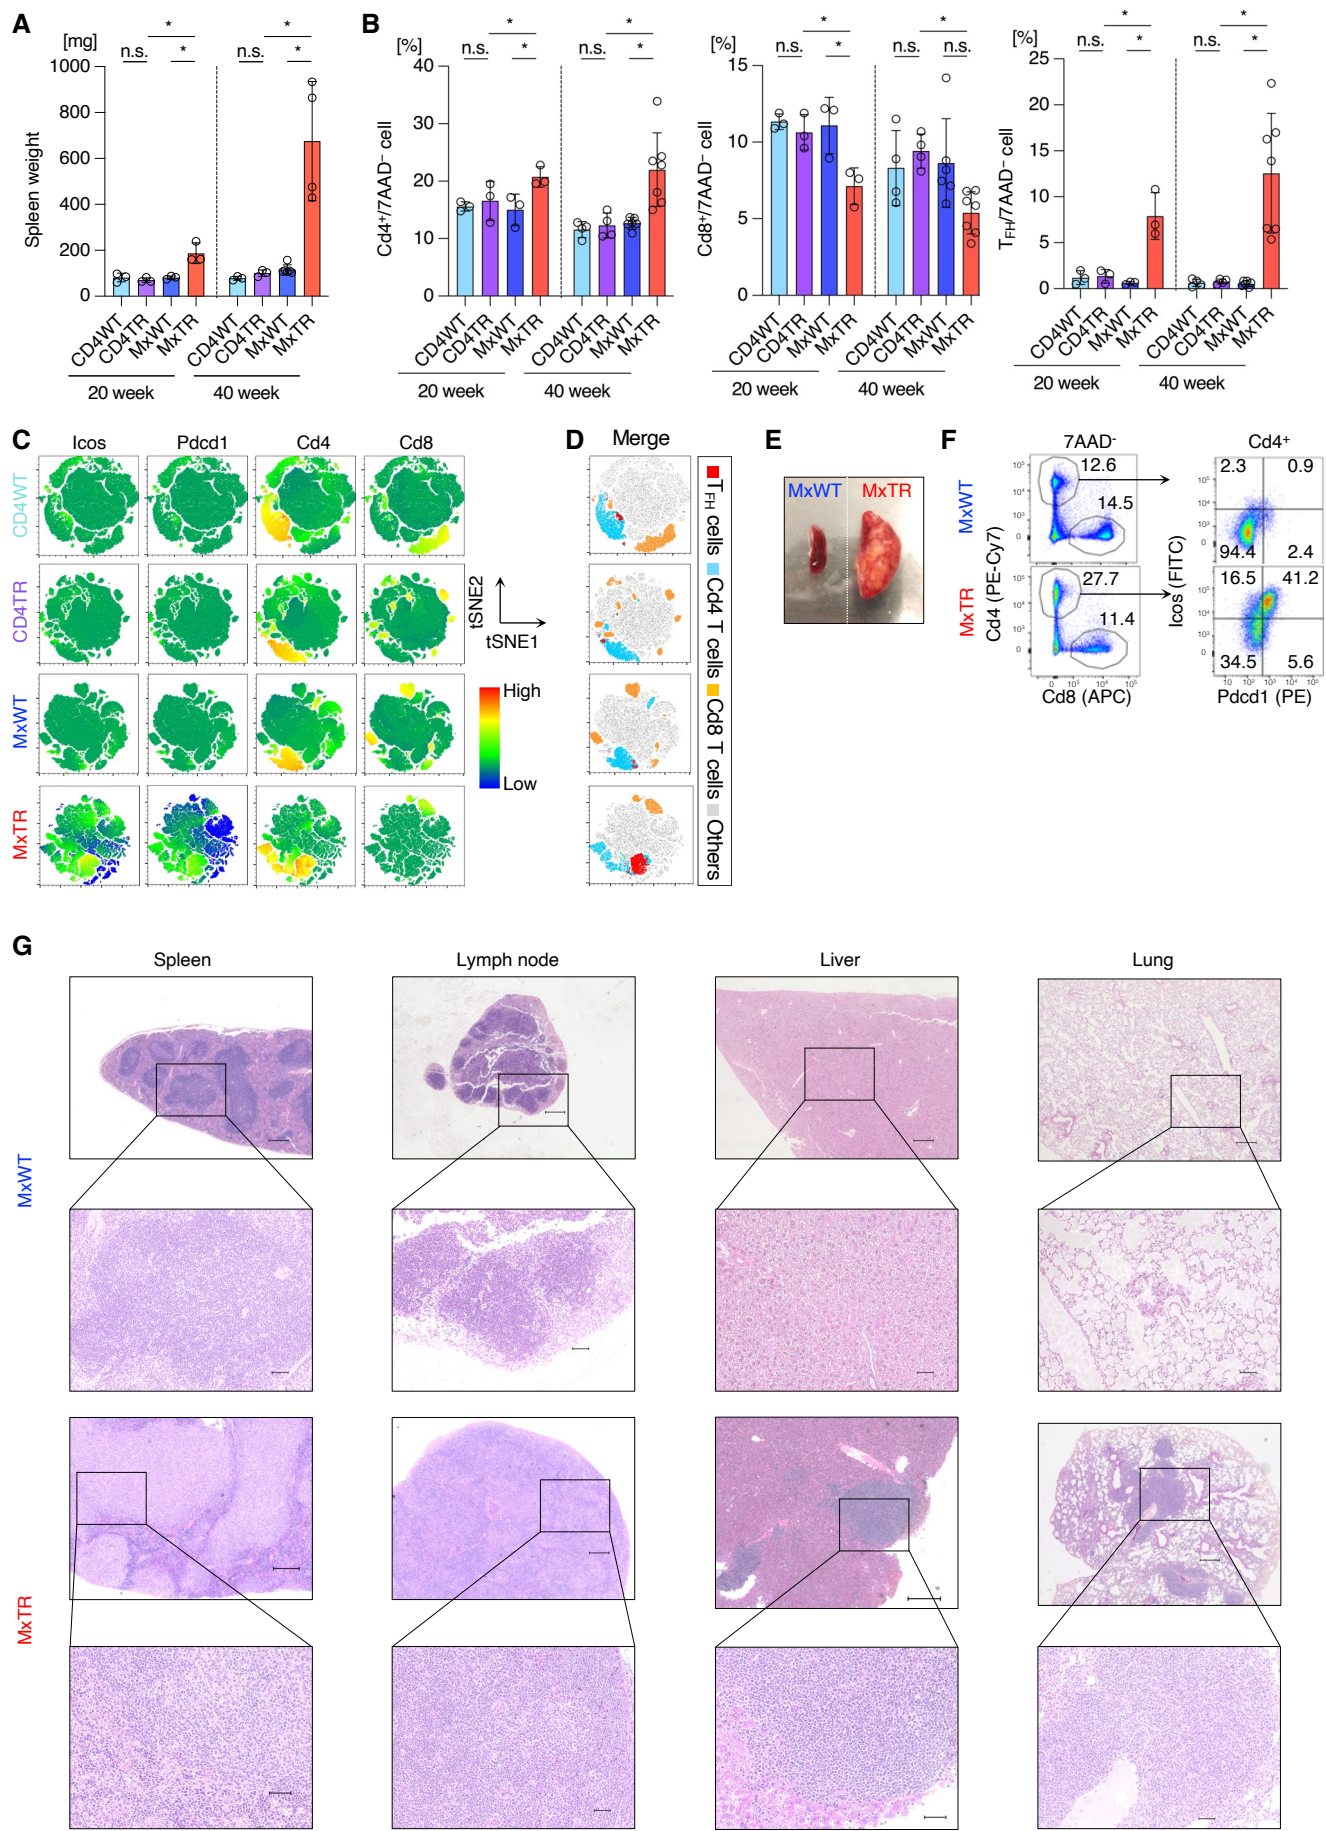

337 **Supplemental Figure 1. Contribution of *Tet2*-deficient immune cells in the development of**  
338  **$T_{FH}$ -like lymphomas**

339 (A) Spleen weights of mice at 20 and 40 weeks of age.

340 (B) The proportions of  $Cd4^+$ ,  $Cd8^+$ , and  $Cd4^+Cd8^-Pdc1^+Icos^+$  ( $T_{FH}$ ) cells determined using  
341 flow cytometry at 20 and 40 weeks of age.

342 (C) Representative tSNE heatmaps of the flow cytometric data of T-cell fractions in the spleen  
343 at 40 weeks of age. The expression of cell surface markers, including Icos, Pdc1, Cd4,  
344 and Cd8.

345 (D) tSNE plots of manually gated and integrated  $T_{FH}$  (red),  $Cd4^+$  (light blue),  $Cd8^+$  (orange)  
346 cells, and others (grey) using data from supplemental Figure 1C.

347 (E) Macroscopic analysis of representative spleens from tumor-bearing MxTR and MxWT at  
348 50 weeks of age.

349 (F) Representative flow cytometric plots of Cd4, Cd8, Icos, and Pdc1 in spleen cells from  
350 tumor-bearing MxTR and MxWT at 50 weeks of age.

351 (G) Low ( $\times 4$ , top) and high ( $\times 20$ , bottom) magnification images showing hematoxylin and  
352 eosin (HE) staining of spleen, lymph node, liver, and lung tissue from tumor-bearing  
353 MxTR and MxWT at 50 weeks of age. Scale bar; 300  $\mu m$  (top), 50  $\mu m$  (bottom).

Supplemental Figure 2

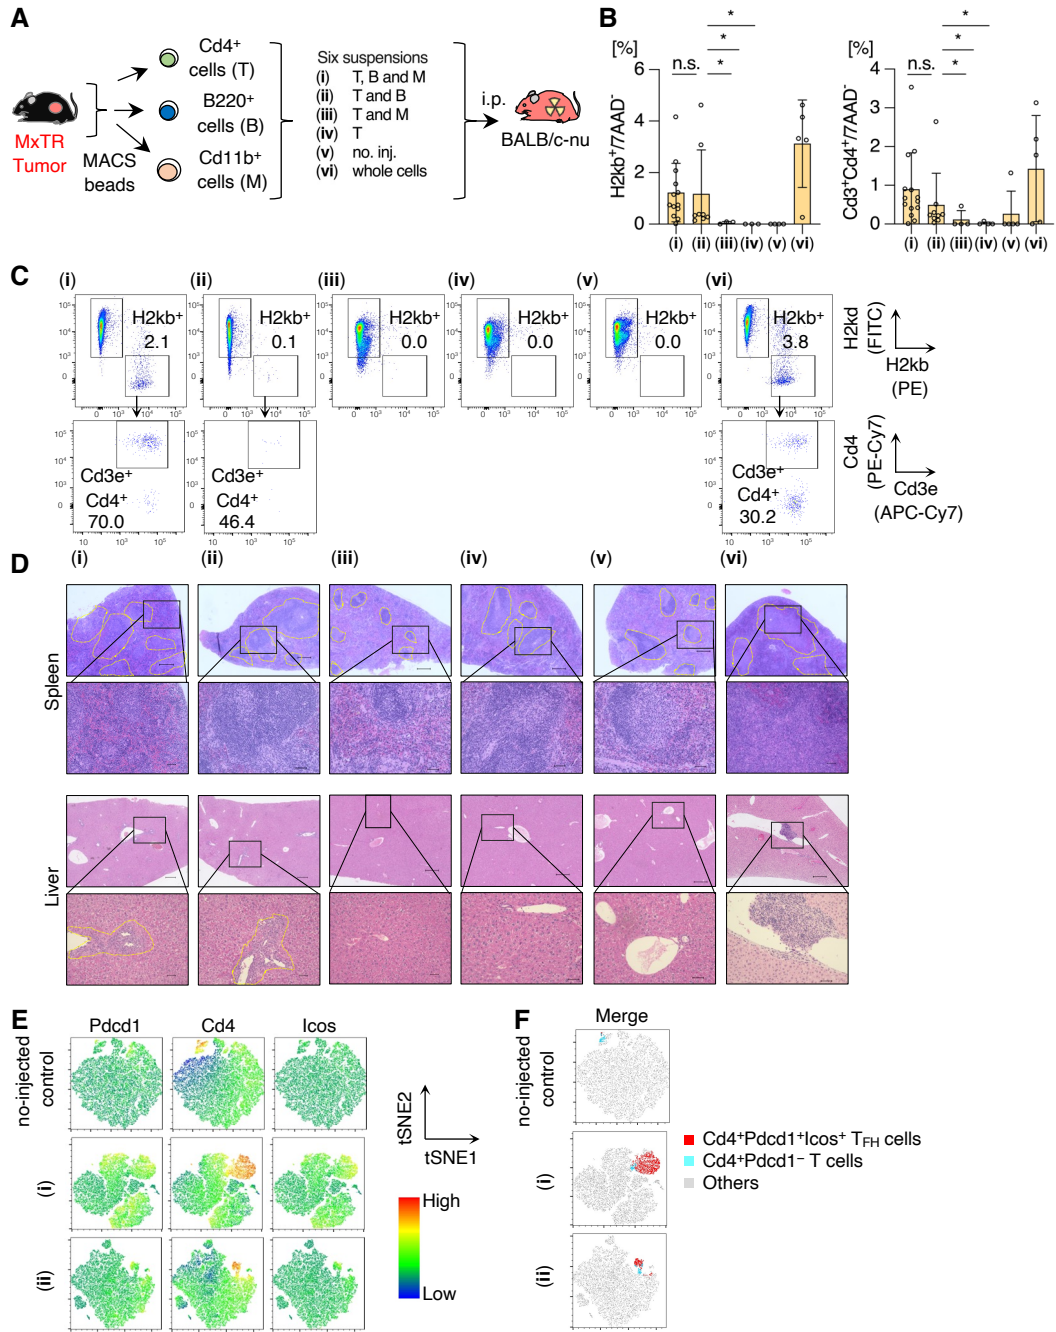

354 **Supplemental Figure 2. Transplantation with fractionated cells sorted from tumors of**

355 **MxTR**

356 (A) Overview of workflow for transplantation of nude mice with Cd4<sup>+</sup>, B220<sup>+</sup>, and Cd11b<sup>+</sup>  
357 cells sorted from tumors of MxTR. i.p., intraperitoneal injection.

358 (B) Proportions of donor-derived H2kb<sup>+</sup> and H2kb<sup>+</sup>Cd3<sup>+</sup>Cd4<sup>+</sup> cells 4 weeks after injection.

359 Six groups (i–vi) represent (i) Cd4<sup>+</sup> cells [T], B220<sup>+</sup> cells [B], and Cd11b<sup>+</sup> cells [M]; (ii)  
360 T and B; (iii) T and M; (iv) T; (v) no injection; and (vi) whole cells (positive controls).

361 (C) Representative flow cytometric plots of H2kd<sup>+</sup> recipient-derived markers, H2kb<sup>+</sup> donor-  
362 derived markers, and H2kb<sup>+</sup>Cd3e<sup>+</sup>Cd4<sup>+</sup> cells in i to vi (Six groups (i–vi) are the same as  
363 in supplemental Figure 2B.).

364 (D) Low (×4, top) and high (×20, bottom) magnification images showing hematoxylin and  
365 eosin (HE) staining of spleen and liver tissue from i to vi (Six groups (i–vi) are the same  
366 as in supplemental Figure 2B.). Splenic follicles and liver infiltration are indicated by  
367 yellow dotted lines. Scale bar; 300 μm (top), 50 μm (bottom).

368 (E) Representative tSNE heatmaps of flow cytometric data from spleen cells from uninjected  
369 control, (i), and (ii) at 4 weeks after transplantation. The expression of cell surface markers,  
370 including Icos, Pdcd1, and Cd4 (Two groups (i and ii) are the same as in supplemental  
371 Figure 2B.).

372 (F) tSNE plots of manually gated and integrated T<sub>FH</sub> (red), Cd4<sup>+</sup>Pdcd1<sup>-</sup> T cells (light blue),  
373 and others (grey) using data from supplemental Figure 2E.  
374 For all panels, \* *p*-value < 0.05; n.s. not significant.



Supplemental Figure 3

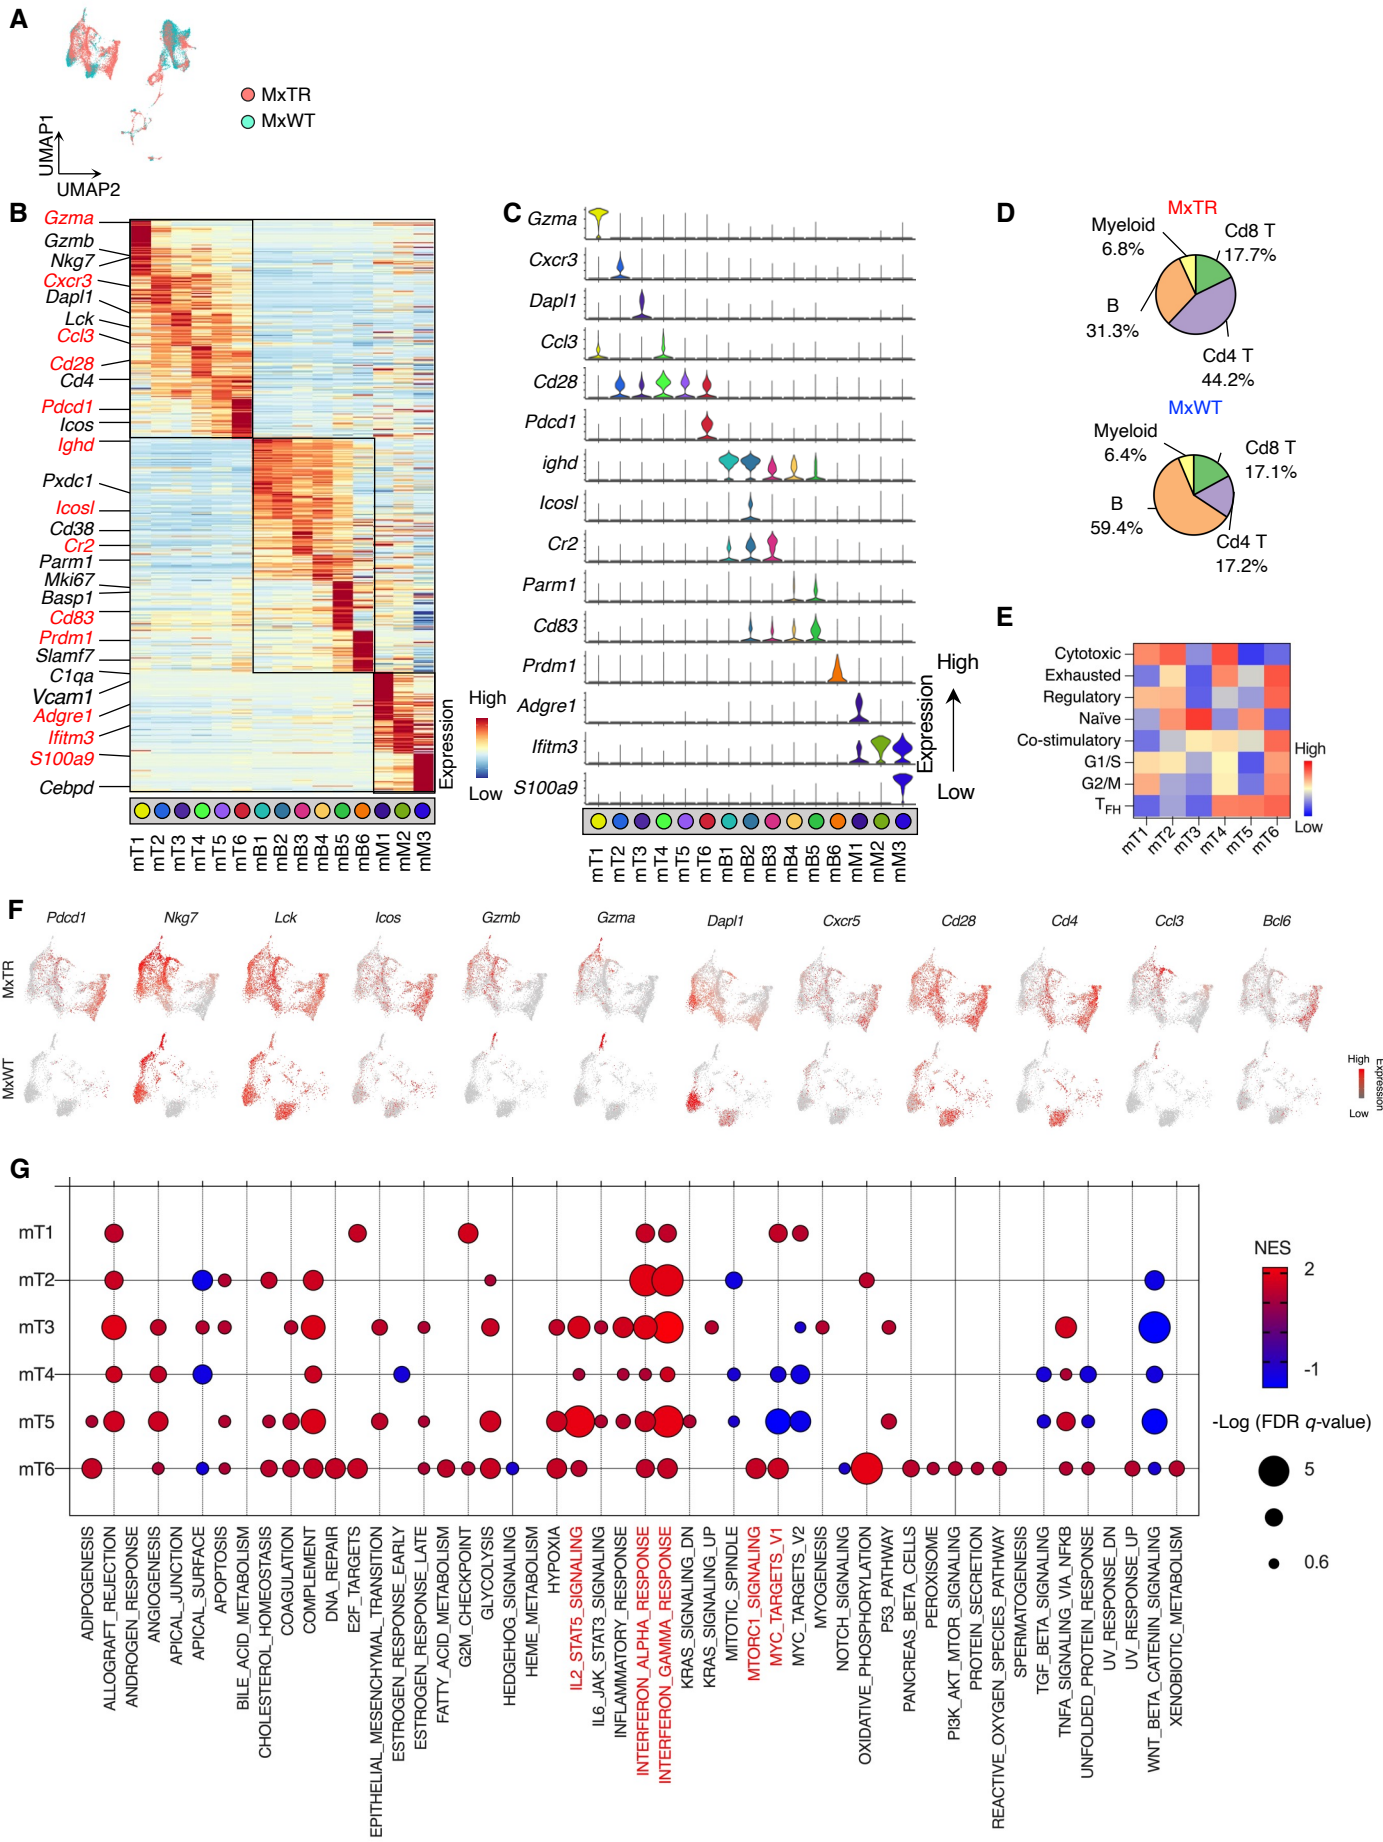

375 **Supplemental Figure 3. Analysis of intratumor heterogeneity in spleen cells from tumor-**  
376 **bearing MxTR or MxWT using single-cell RNA sequencing (scRNA-seq)**

377 (A) UMAP plot showing integrated scRNA-seq data from spleen cells from tumor-bearing  
378 MxTR and MxWT.

379 (B) Heatmap of top 50 conserved markers in each cluster. Rectangle group clusters from each  
380 cell type. Genes in red represent specific conserved markers in each cluster. Top 50  
381 markers highly expressed in each cluster are listed in supplemental Table 1.

382 (C) Stacked violin plots showing specific conserved markers in each cluster.

383 (D) Pie charts showing the proportions of Cd8 T, Cd4 T, B, and myeloid cells in the MxTR  
384 and MxWT samples.

385 (E) GSVA with T-cell related gene sets from Chung et al. and T<sub>FH</sub>-tumor cell signatures from  
386 Nguyen et al. Gene sets are listed in supplemental Table 8.

387 (F) Feature plots for markers characteristic of T cells.

388 (G) Dot plots showing pathways upregulated in mT1–6 from MxTR compared to that from  
389 MxWT, using GSEA with hallmark gene sets of MsigDB. Dot size indicates  $-\text{Log}(\text{FDR } q\text{-}$   
390  $\text{value})$ .

391



Supplemental Figure 4

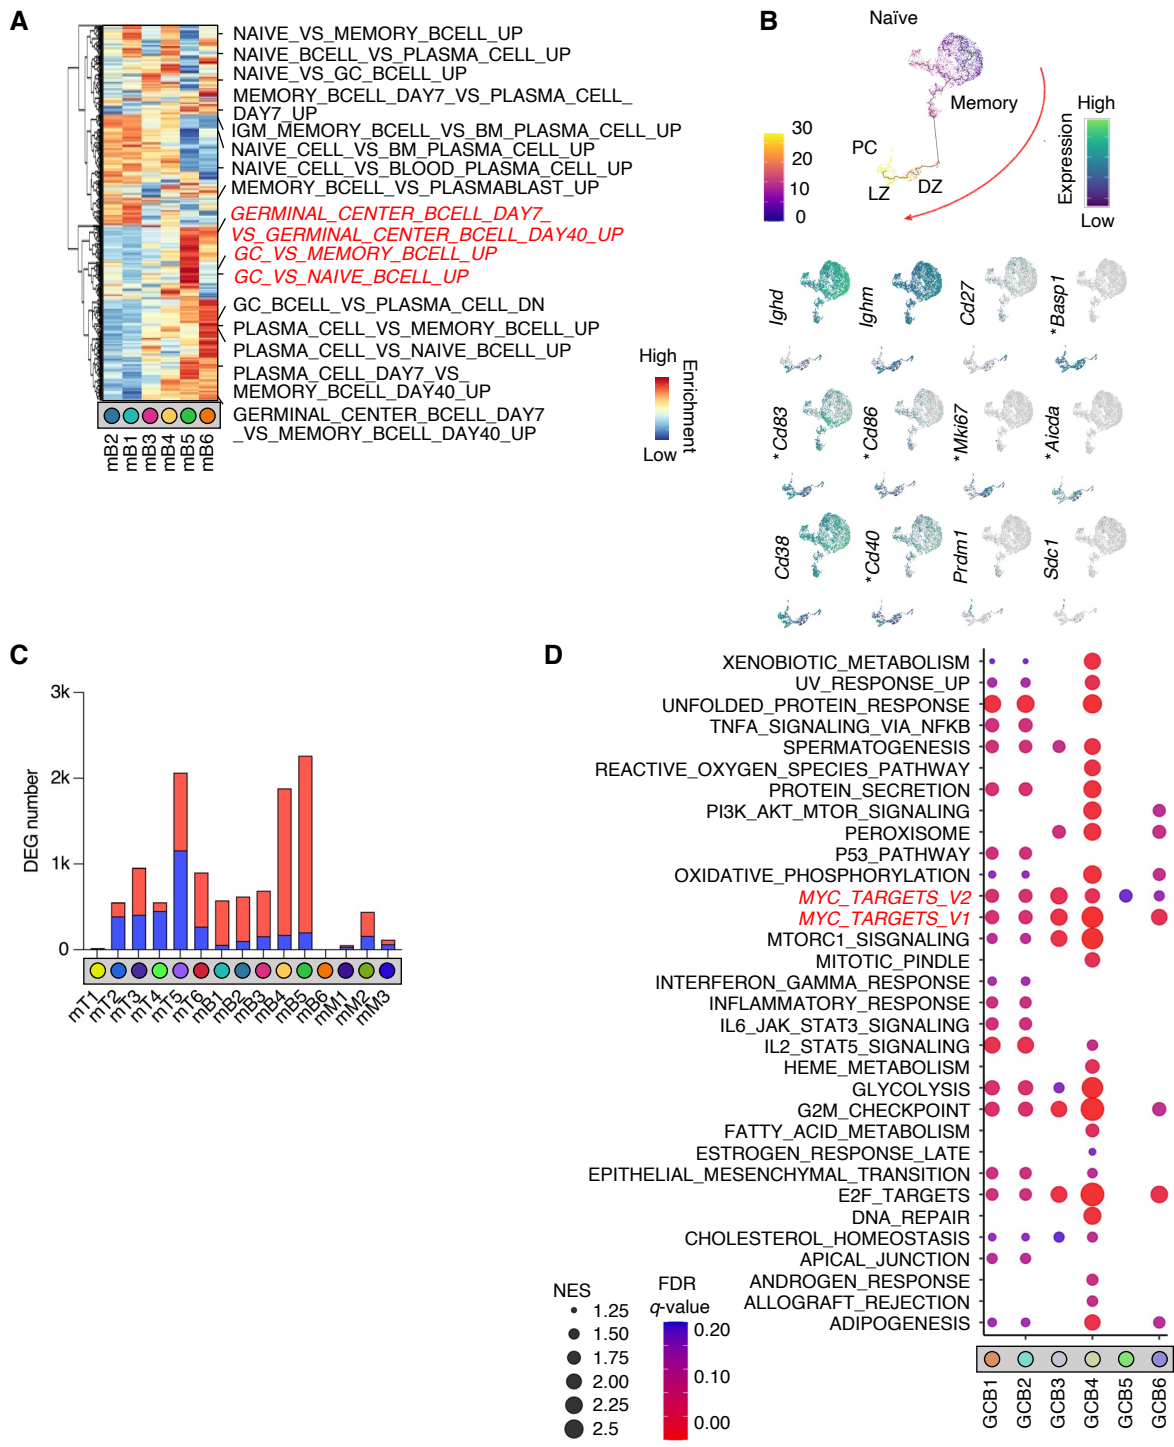

392 **Supplemental Figure 4. Transcriptomic heterogeneity in B-cell subclusters of T<sub>FH</sub>-like**  
393 **lymphomas**

394 (A) Heatmap showing pathways differentially enriched in each B-cell cluster (mB1–6) by  
395 GSVA with C7 gene sets of MsigDB. Gene sets in red indicate pathways enriched in mB5.

396 (B) scRNA-seq data focusing on B cells, indicating B-cell differentiation steps using pseudo-  
397 time analysis and representative feature plots. Dark winding lines in the UMAP plots  
398 indicate the presumed developmental trajectories. \* GCB-related markers.

399 (C) Bar graphs showing the number of differentially expressed genes (DEGs) upregulated in  
400 MxTR (red) and MxWT (blue) samples.

401 (D) Dot plots showing pathways upregulated in GCB1–6 from MxTR compared to that from  
402 MxWT, using GSEA with hallmark gene sets of MsigDB. Dot size indicates NES. Cut-off,  
403 FDR  $q$ -value < 0.25.

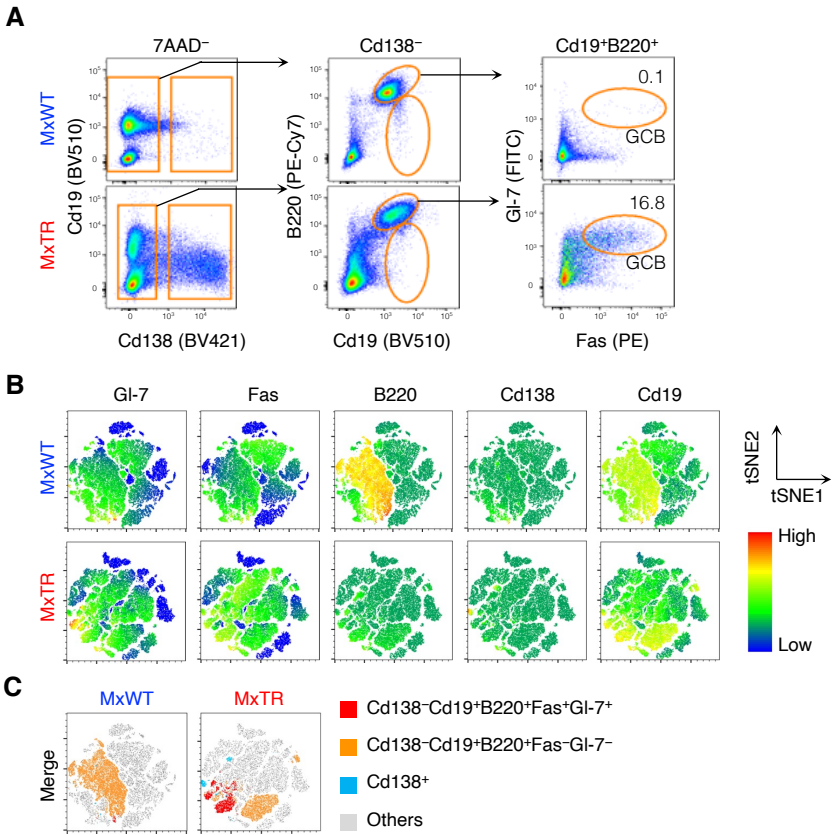

404 **Supplemental Figure 5. Flow cytometric analysis of B-cell fractions in spleen cells from**

405 **MxTR and MxWT**

406 (A) Representative flow cytometry plots of Cd138, Cd19, B220, Fas, and Gl-7 in spleen cells  
407 from tumor-bearing MxTR and MxWT at ~50 weeks of age.

408 (B) Representative tSNE heatmaps of flow cytometric data of Cd138, Cd19, B220, Fas, and  
409 Gl-7 in spleen cells of tumor-bearing MxTR and MxWT at ~50 weeks of age.

410 (C) tSNE plots of manually gated and integrated Cd138<sup>-</sup>Cd19<sup>+</sup>B220<sup>+</sup>Fas<sup>+</sup>Gl-7<sup>+</sup> (red),  
411 Cd138<sup>-</sup>Cd19<sup>+</sup>B220<sup>+</sup>Fas<sup>-</sup>Gl-7<sup>-</sup> (orange), Cd138<sup>+</sup> (light blue) cells, and others (grey) using  
412 data from supplemental Figure 5B.

Supplemental Figure 6

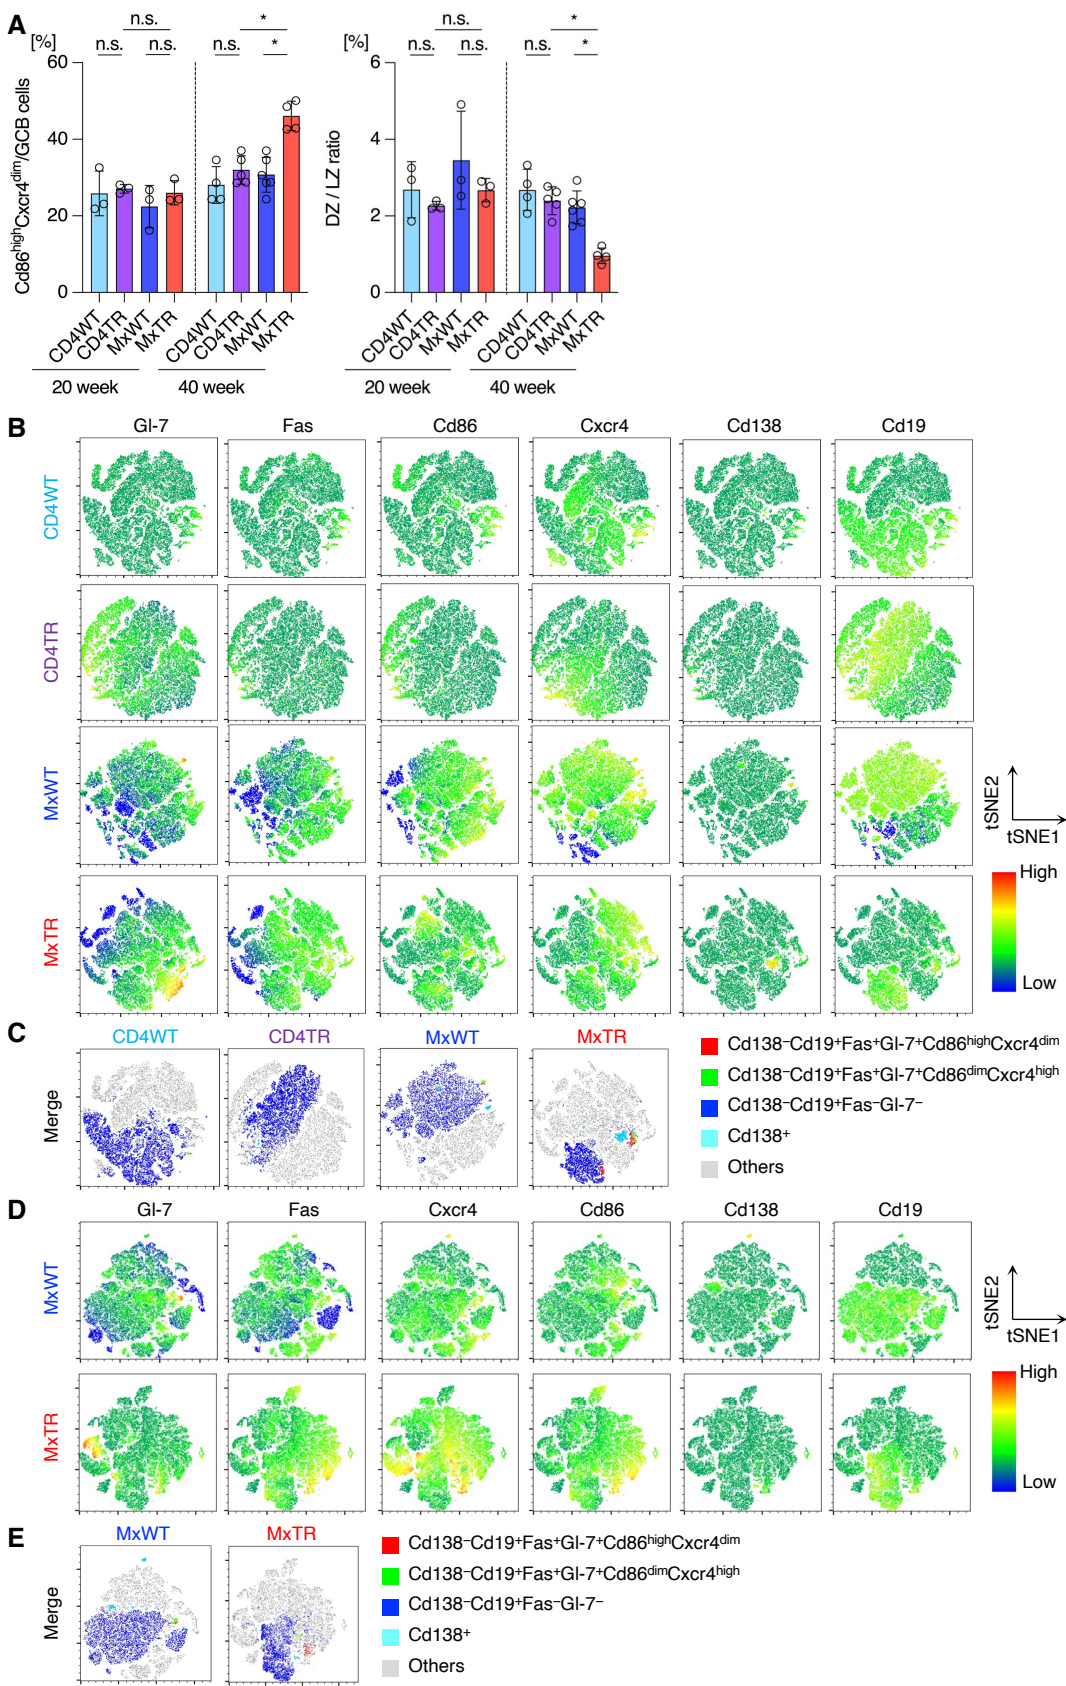

413 **Supplemental Figure 6. Flow cytometric analysis of GCB fractions in spleen cells from**

414 **MxTR and MxWT**

415 (A) Proportions of Cd86<sup>high</sup>Cxcr4<sup>dim</sup> light zone (LZ) /total GCB cells and Cd86<sup>dim</sup>Cxcr4<sup>high</sup> dark  
416 zone (DZ)/LZ GCB cells in spleen cells from mice of the indicated genotypes at 20 and  
417 40 weeks of age. MxTR, n = 6; MxWT, n = 4; CD4TR, n = 4; CD4WT, n = 5.

418 (B) Representative tSNE heatmaps of flow cytometric data of GCB fractions found in spleen  
419 cells from mice with the indicated genotypes at 40 weeks of age. The cell surface markers  
420 Gl-7, Fas, Cd86, Cxcr4, and Cd138, indicated GCB cells or plasma cells (PCs).

421 (C) tSNE plots of manually gated and integrated Cd138<sup>-</sup>Cd19<sup>+</sup>Fas<sup>+</sup>Gl-7<sup>+</sup>Cd86<sup>high</sup>Cxcr4<sup>dim</sup>  
422 (red), Cd138<sup>-</sup>Cd19<sup>+</sup>Fas<sup>+</sup>Gl-7<sup>+</sup>Cd86<sup>dim</sup>Cxcr4<sup>high</sup> (light green), Cd138<sup>-</sup>Cd19<sup>+</sup>Fas<sup>-</sup>Gl-7<sup>-</sup>  
423 (blue), Cd138<sup>+</sup> (light blue) cells, and others (grey) using data from supplemental Figure  
424 6B.

425 (D) Representative tSNE heatmaps of flow cytometric data of Cd138, Cd19, Fas, Gl-7, Cxcr4,  
426 and Cd86 in spleen cells from tumor-bearing MxTR and MxWT at ~50 weeks of age.

427 (E) tSNE plots of manually gated and integrated Cd138<sup>-</sup>Cd19<sup>+</sup>Fas<sup>+</sup>Gl-7<sup>+</sup>Cd86<sup>high</sup>Cxcr4<sup>dim</sup>  
428 (red), Cd138<sup>-</sup>Cd19<sup>+</sup>Fas<sup>+</sup>Gl-7<sup>+</sup>Cd86<sup>dim</sup>Cxcr4<sup>high</sup> (light green), Cd138<sup>-</sup>Cd19<sup>+</sup>Fas<sup>-</sup>Gl-7<sup>-</sup>  
429 (blue), Cd138<sup>+</sup> (light blue) cells, and others (grey) using data from supplemental Figure  
430 6D.

Supplemental Figure 7

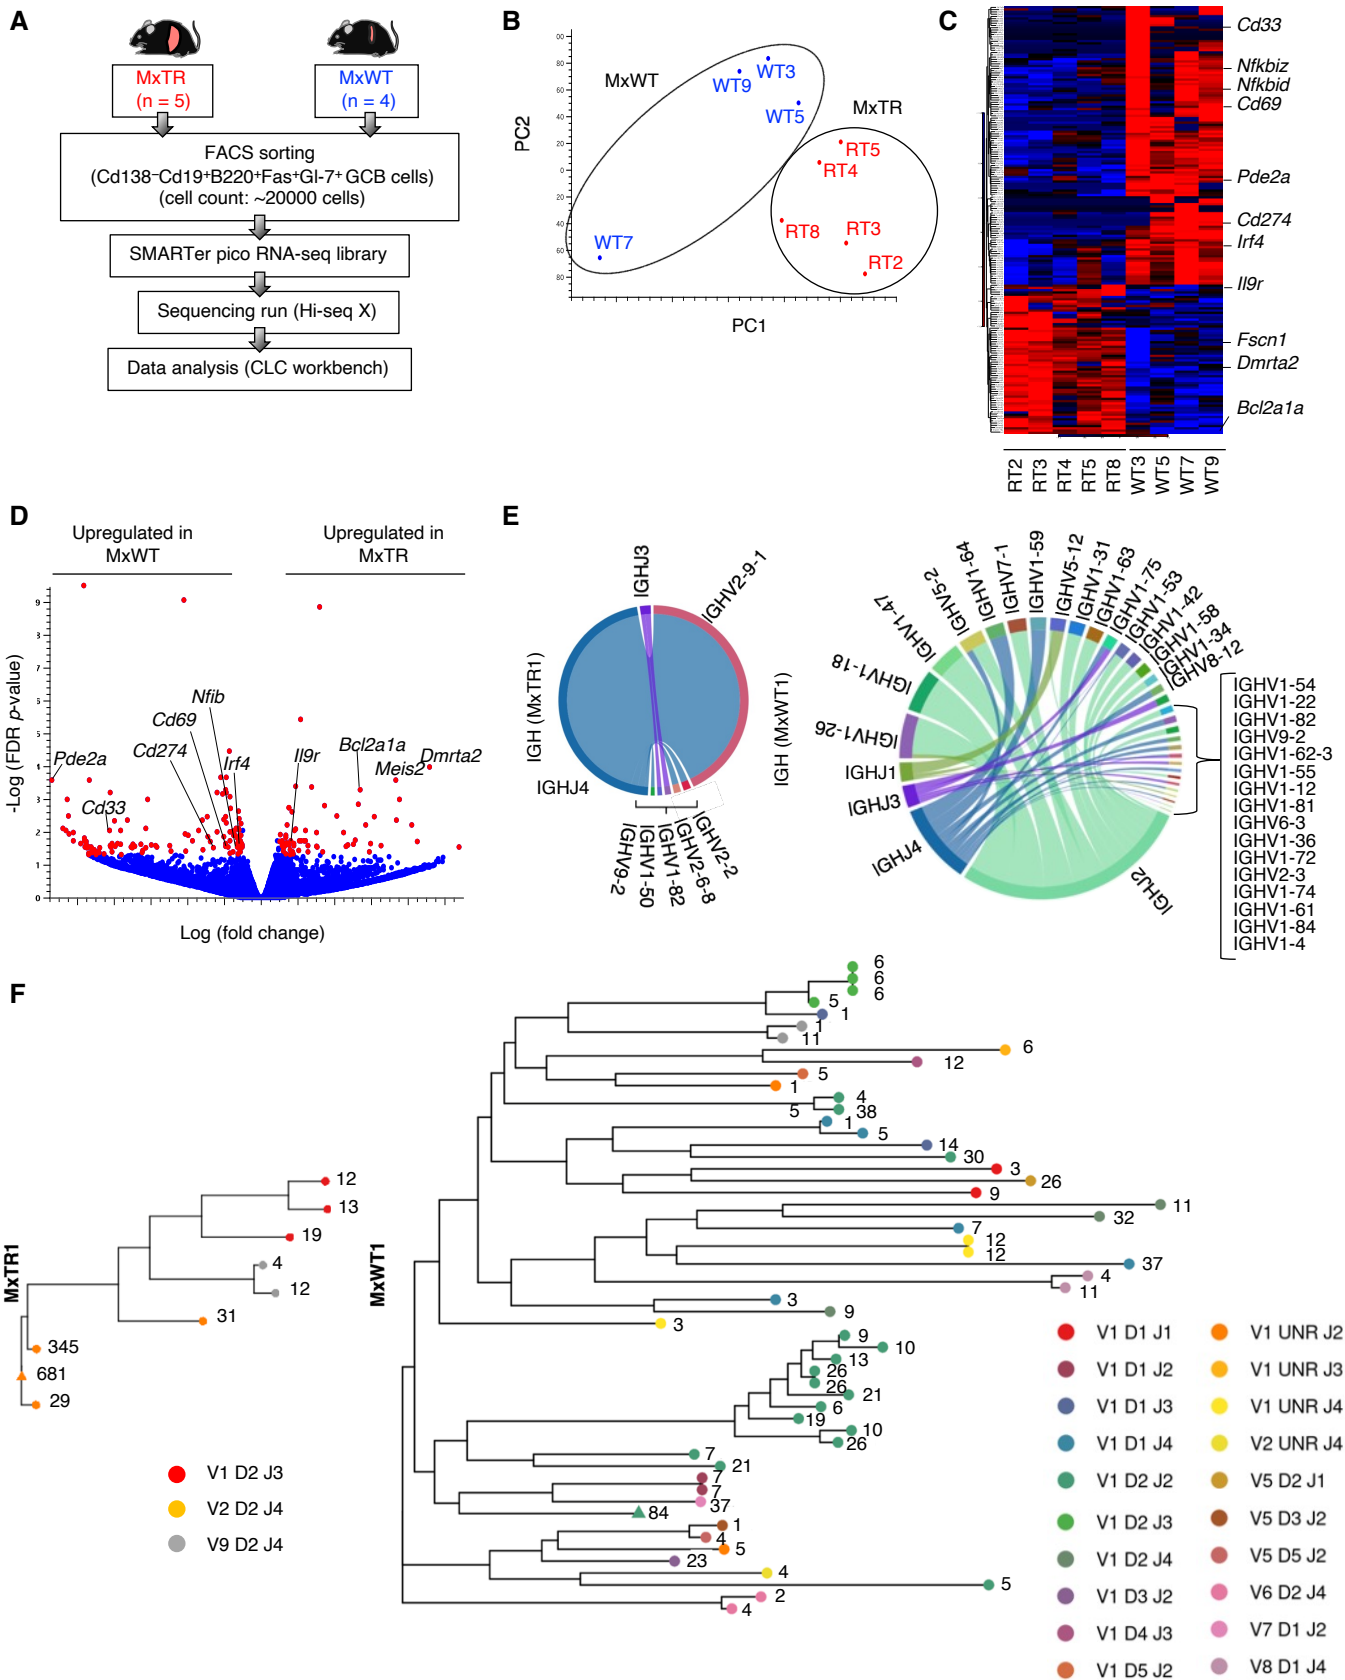

431 **Supplemental Figure 7. RNA-seq analysis of GCB cells sorted from tumor-bearing MxTR**

432 **and MxWT**

433 (A) Overview of RNA-seq for GCB cells in spleen cells from MxTR (n = 5) and MxWT (n =  
434 4) mice.

435 (B) PCA plot for RNA-seq. Blue dots, MxWT; red dots, MxTR.

436 (C) Unsupervised hierarchical clustering analyses of RNA-seq data for GCB cells from MxTR  
437 and MxWT.

438 (D) Volcano plot of up- or down-regulated genes in GCB cells from MxTR and MxWT. Cut-  
439 off; FDR  $p$ -value  $\geq 0.1$  with LogFC  $> |2|$  (red), FDR  $p$ -value  $< 0.1$ , or LogFC  $\leq |2|$  (blue).

440 (E) Chord diagrams showing associations between *Ighv* and *Ighj* genes in GCB cells from  
441 MxTR1 and MxWT1 mice, respectively.

442 (F) Phylogenetic trees showing *Igh* expression in MxTR1 (left) or MxWT1 (right) GCB cells.  
443 Branches are color-coded to indicate V, D, and J gene usage. Numbers next to each branch  
444 refer to the sequence count.



Supplemental Figure 8

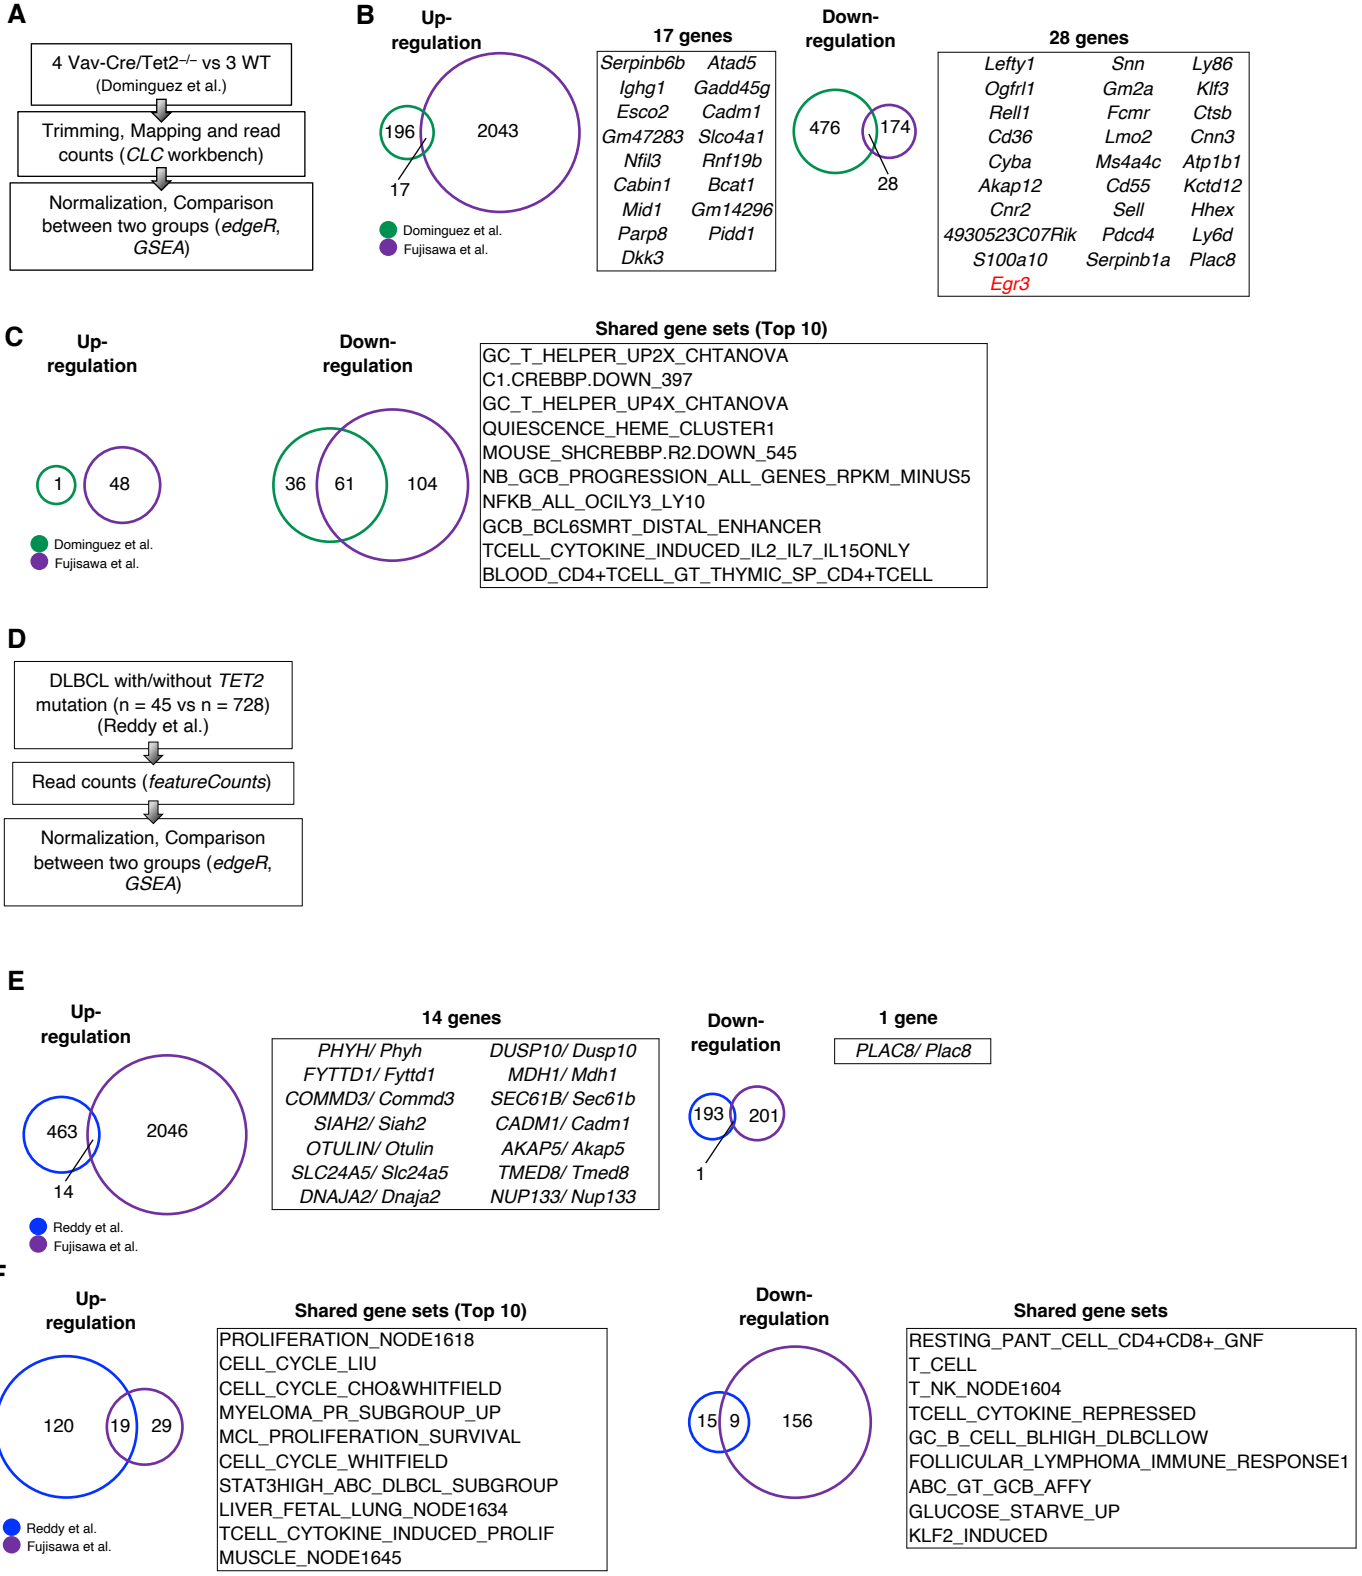

445 **Supplemental Figure 8. Comparison between RNA-seq data of GCB cells from MxTR and**  
446 **those from Vav-Cre/Tet2<sup>-/-</sup> or human DLBCL with TET2 mutation.**

447 (A) Scheme for reanalysis of RNA-seq data for Vav-Cre/Tet2<sup>-/-</sup> and VAV1-Cre/Tet2<sup>+/+</sup> (WT).

448 (B) Venn diagram showing shared genes significantly up- or downregulated in Vav-  
449 Cre/Tet2<sup>-/-</sup> (green) and MxTR (purple) relative to each wild type, respectively. Shared  
450 genes are listed.

451 (C) Venn diagram showing shared gene sets significantly enriched in Vav-Cre/Tet2<sup>-/-</sup>  
452 (green) and MxTR (purple) relative to each wild type, respectively.<sup>17</sup>

453 (D) Scheme for reanalysis of RNA-seq data for human DLBCL samples with/without TET2  
454 mutations. Shared genes are listed.

455 (E) Venn diagram showing common genes significantly up- or downregulated in DLBCL  
456 with TET2 mutations (blue) and GCB cells from and MxTR (purple).

457 (F) Venn diagram showing common gene sets significantly enriched in DLBCL with TET2  
458 mutations (blue) and GCB cells from and MxTR (purple). Shared gene sets are listed.

459

460

Supplemental Figure 9

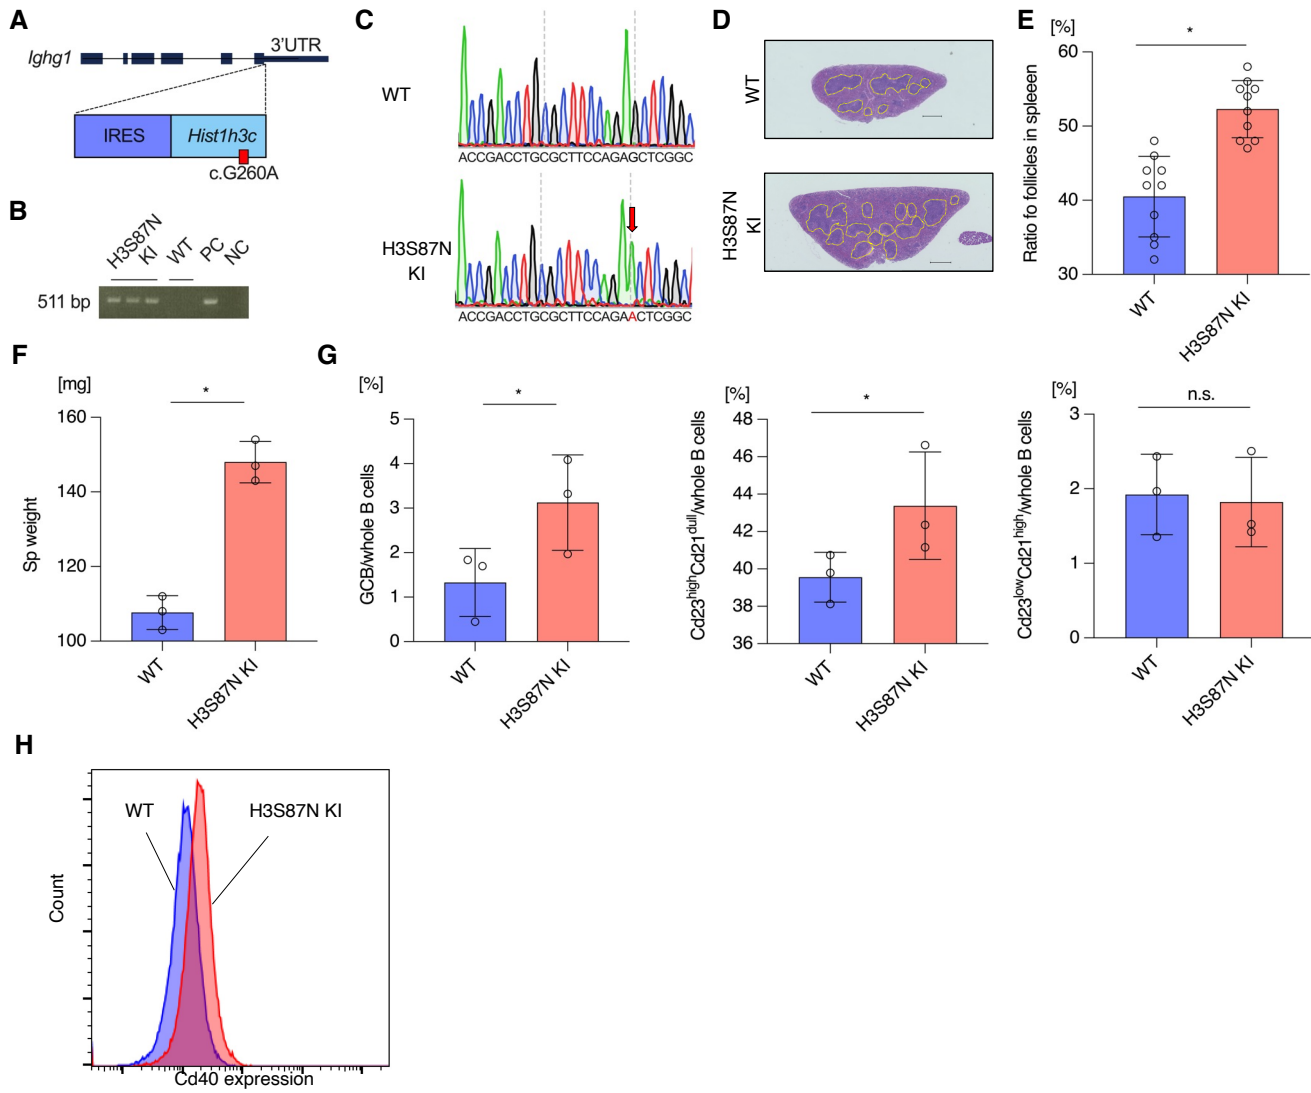

461 **Supplemental Figure 9. Expansion of GCB cells in H3S87N KI**

462 (A) A structure of the *Hist1h3c* S87N (c.G>A260) mutant vector inserted on the 3' UTR of  
463 the *Ighg1* promoter.

464 (B) Genomic PCR analysis to confirm the insertion of *Hist1h3c* S87N mutant vector in the  
465 tail DNA of H3S87N KI. WT, wild-type; PC, positive control; NC, negative control.

466 (C) Sequence chromatography of TA cloning vector of *Hist1h3c* exon1 in GCB cells of spleen  
467 of H3S87N KI. The upper panel shows wild type (WT) and the lower panel shows  
468 H3S87N (c.G>A260) mutation.

469 (D) HE-stained sections of spleen tissues from H3S87N KI and WT. Splenic follicles are  
470 indicated by yellow dotted lines.

471 (E) Proportion of follicle area in spleen tissue from mice of the indicated genotypes at 15  
472 weeks of age. The area of follicles was compared by 10 sections per 2  $\mu$ m of spleen of  
473 one H3S87N KI and one WT.

474 (F) Spleen weights of mice at 15 weeks of age. Sp, spleen.

475 (G) The proportions of GCB, Cd23<sup>high</sup>Cd21<sup>dull</sup> (FOB), Cd23<sup>dull</sup>Cd21<sup>high</sup> (MZB) cells using  
476 flow cytometry at 15 weeks of age.

477 (H) Histograms showing cell surface Cd40 expression in GCB cells of spleen from H3S87N  
478 KI and WT.

Supplemental Figure 10

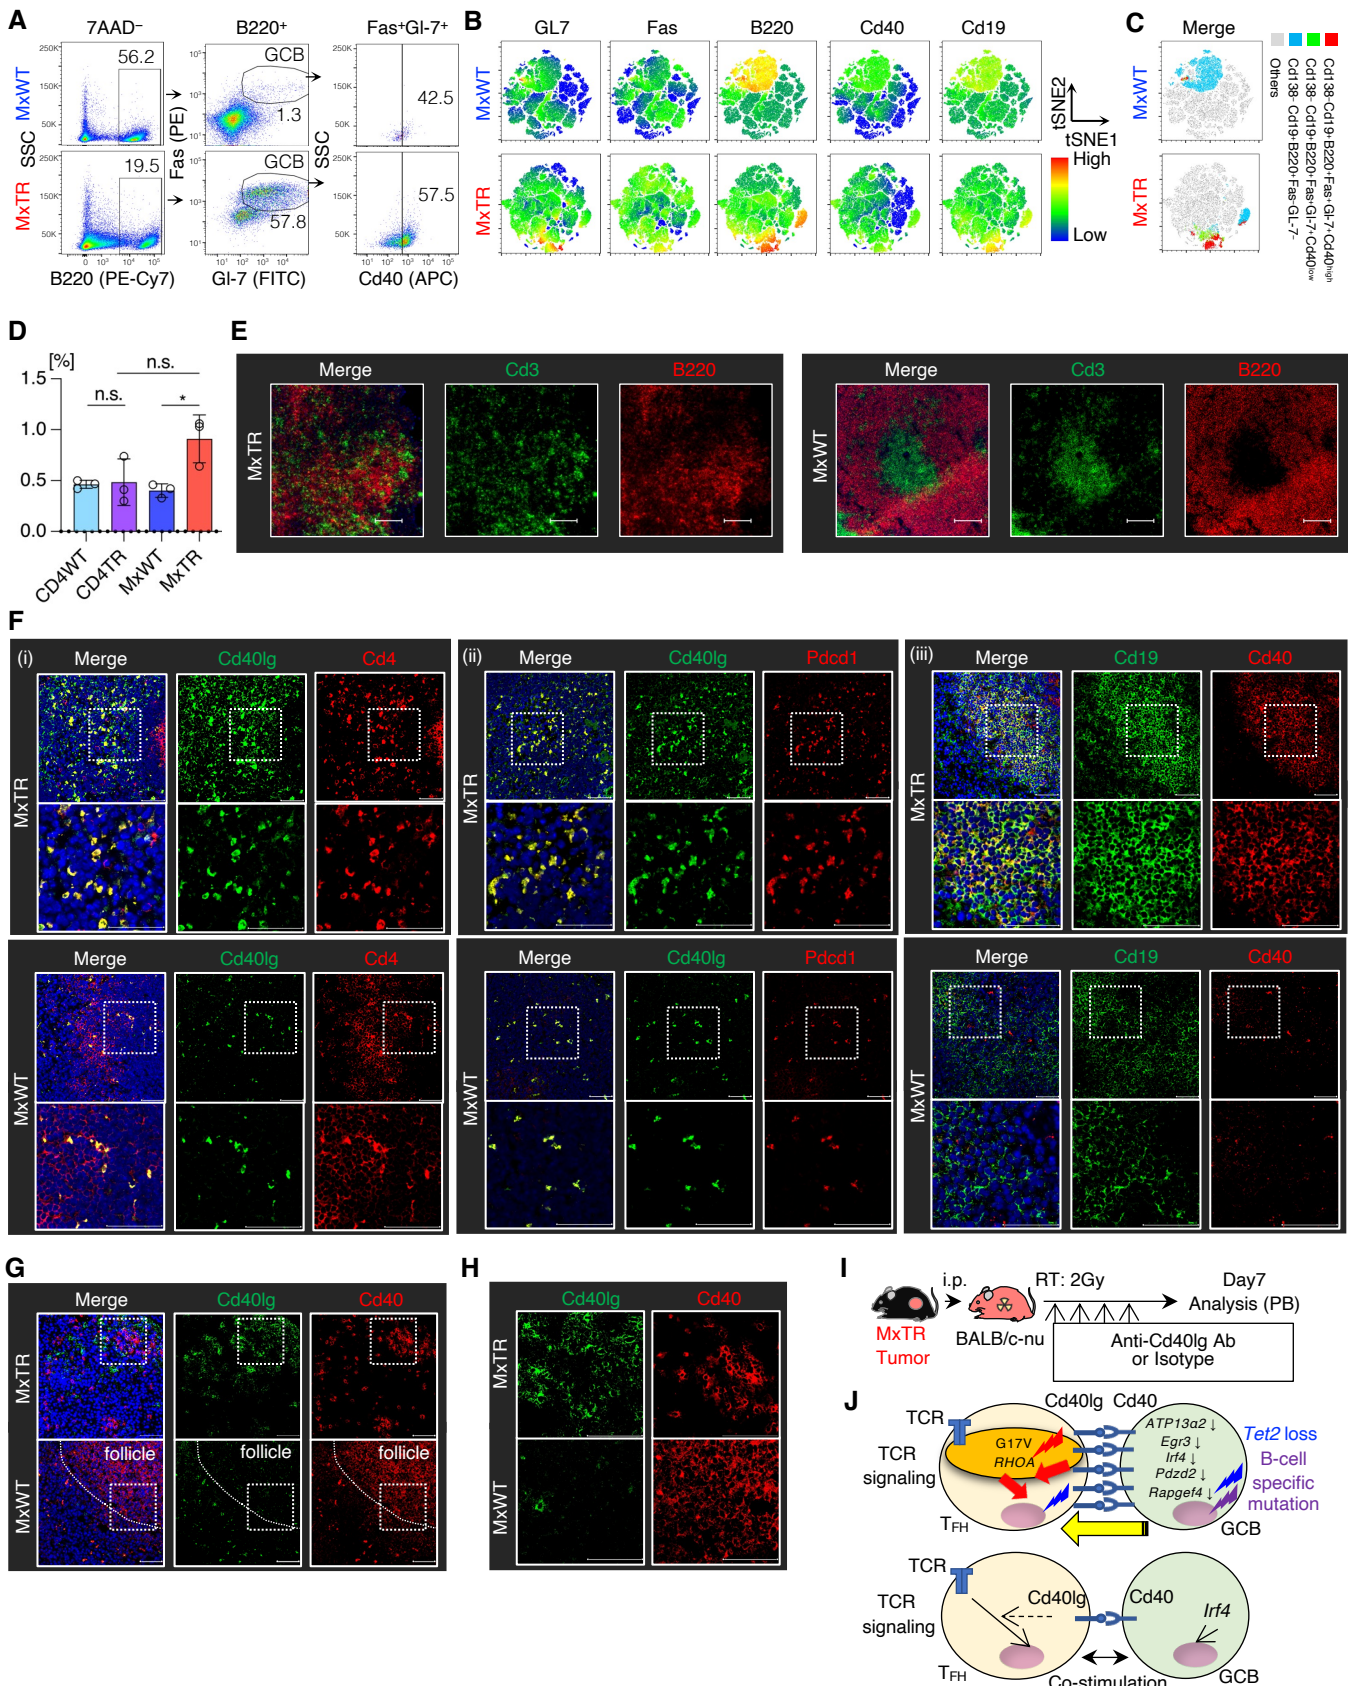

479 **Supplemental Figure 10. Cd40 expression in GCB cells and treatment of mice with an anti-**

480 **Cd40lg antibody**

481 Representative flow cytometric plots (A) and tSNE heatmaps (B) of Cd19, B220, Fas, Gl-

482 7, and Cd40 in spleen cells from tumor-bearing MxTR and MxWT at ~50 weeks of age.

483 (C) tSNE plots manually gated and integrated Cd138<sup>-</sup>Cd19<sup>+</sup>B220<sup>+</sup>Fas<sup>+</sup>Gl-7<sup>+</sup>Cd40<sup>high</sup> (red),

484 Cd138<sup>-</sup>Cd19<sup>+</sup>B220<sup>+</sup>Fas<sup>+</sup>Gl-7<sup>+</sup>Cd40<sup>low</sup> (light green), Cd138<sup>-</sup>Cd19<sup>+</sup>Fas<sup>-</sup>Gl-7<sup>-</sup> (light blue),

485 and others (grey) using data from supplemental Figure. 9B.

486 (D) Cd40 expression in GCB cells at 20 weeks of age.

487 Immunofluorescence staining of spleen tissue in tumor-bearing MxTR or MxWT. (E)

488 Green, Cd3; red, B220; blue, DAPI. Images were acquired at ×20. Scale bars, 100 μm. (F)

489 (i) Green, Cd40lg; red, Cd4; blue, DAPI; (ii) green, Cd40lg; red, Pdcd1; blue, DAPI; (iii)

490 green, Cd19; red, Cd40; blue, DAPI. Low (×40, top) and high (×100, bottom)

491 magnification. High magnification image at bottom corresponds to dashed boxed area at

492 upper. Scale bars, 50 μm.

493 (G, H) Green, Cd40lg; red, Cd40; blue, DAPI. High magnification image corresponds to

494 dashed boxed area. Images were acquired at ×40 (G) or ×100 (H). Sp, Spleen. Scale bars,

495 50 μm.

496 (I) Experimental schema illustrating the treatment of tumor-bearing mice with an anti-mouse

497 Cd40lg (C154) antibody or control hamster IgGf (ab') isotype. To establish tumors, a  
498 single cell suspension prepared from tumors of MxTR was intraperitoneally injected into  
499 nude mice. i.p., intraperitoneal injection; RT, irradiation therapy; PB, peripheral blood; Ab,  
500 antibody.

501 (J) Schema showing the proposed interaction between  $T_{FH}$ -tumor and GCB cells in  $T_{FH}$ -like  
502 lymphomas (top panel) and physiological interaction between  $T_{FH}$  and GCB cells in  
503 normal follicles (bottom panel). TCR, T-cell receptor.



# Supplemental Figure 11

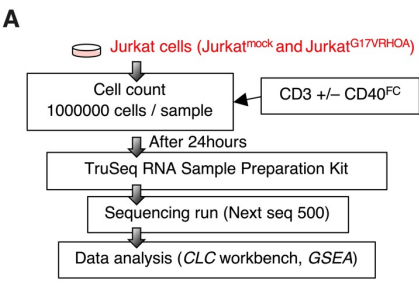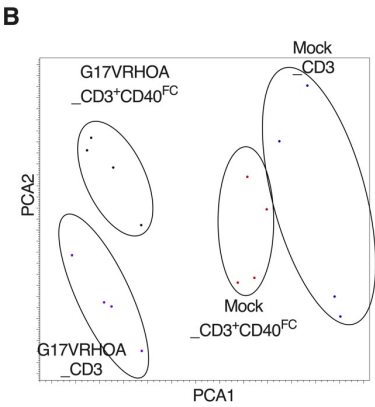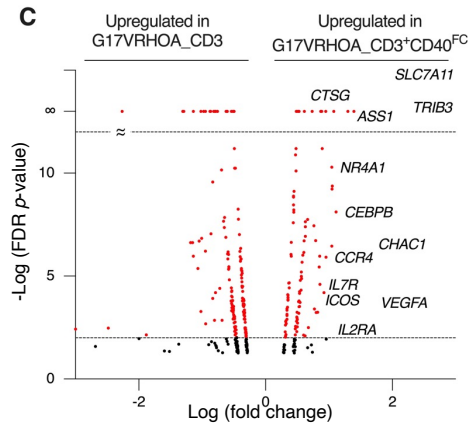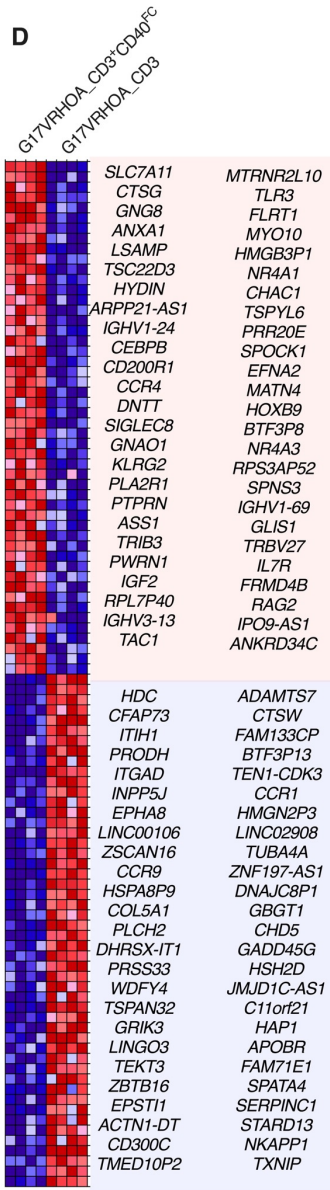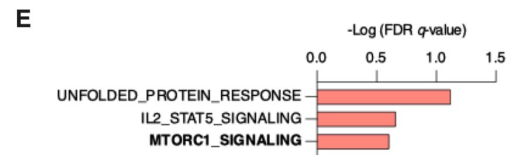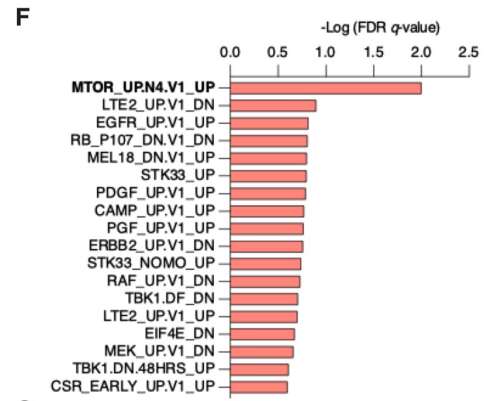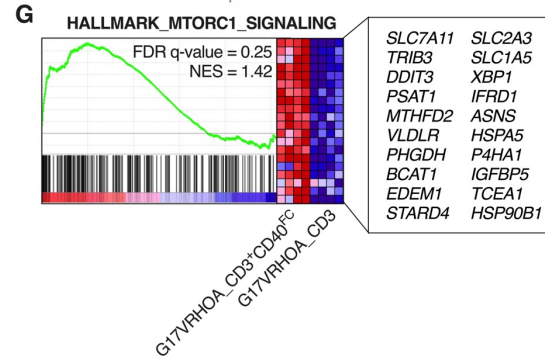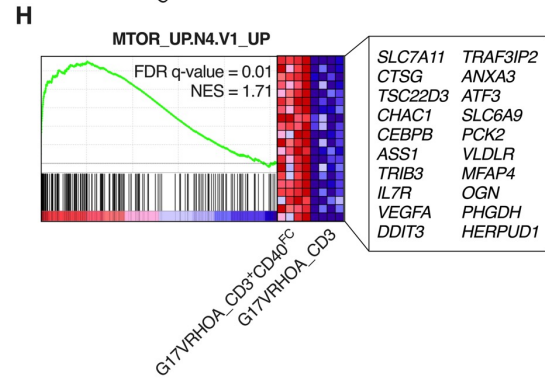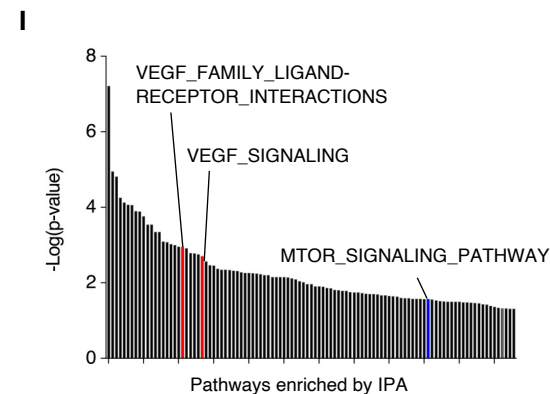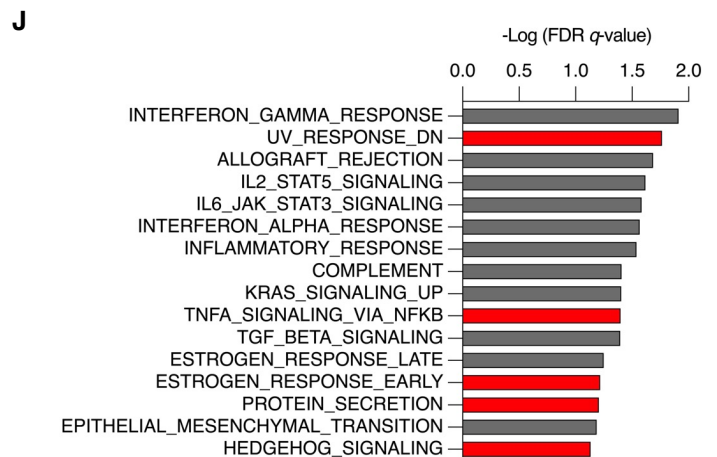



504 **Supplemental Figure 11. RNA-seq analysis of Jurkat<sup>G17VRHOA</sup> and Jurkat<sup>mock</sup> with or**  
505 **without CD40-Fc chimera protein under the stimulation by an anti-CD3 antibody**

506 (A) Overview of RNA-seq for Jurkat<sup>G17VRHOA</sup> and Jurkat<sup>mock</sup> with or without CD40-Fc  
507 chimera protein (CD40<sup>FC</sup>) or Fc protein as control under the stimulation by an anti-  
508 CD3 antibody (CD3).

509 (B) PCA plot for RNA-seq.

510 (C) Volcano plot of up- or down-regulated genes in Jurkat<sup>G17VRHOA</sup> with CD40-Fc chimera  
511 protein (G17VRHOA\_CD3<sup>+</sup>CD40<sup>FC</sup>) or Fc protein as control (G17VRHOA\_CD3)  
512 under the stimulation by an anti-CD3 antibody. Genes statistically different between  
513 two groups were shown in red at cut-off FDR  $p$ -value < 0.05.

514 (D) Heatmap by top 50 genes differentially expressed between G17VRHOA\_CD3<sup>+</sup>CD40<sup>FC</sup>  
515 and G17VRHOA\_CD3.

516 Gene sets enriched in G17VRHOA\_CD3<sup>+</sup>CD40<sup>FC</sup> relative to G17VRHOA\_CD3  
517 based on GSEA with hallmark (E) or C5 (F) gene sets of MsigDB.

518 GSEA of HALLMARK MTORC1 SIGNALING (G) and MTOR UP.N4.V1 (H) for  
519 Jurkat<sup>G17VRHOA</sup>, G17VRHOA\_CD3<sup>+</sup>CD40<sup>FC</sup> (n = 4); and G17VRHOA\_CD3 (n = 4).

520 (I) Gene sets enriched in G17VRHOA\_CD3<sup>+</sup>CD40<sup>FC</sup> relative to G17VRHOA\_CD3  
521 based on IPA (Ingenuity Pathway Analysis). The gene sets related to VEGF and mTOR

522 pathway are highlighted in red and blue,  
523 (J) Gene sets enriched in G17VRHOA\_CD3<sup>+</sup>CD40<sup>FC</sup> relative to Mock\_CD3<sup>+</sup>CD40<sup>FC</sup> based  
524 on GSEA with hallmark gene sets of MsigDB. Red bars indicate signatures enriched  
525 only in G17V\_CD3<sup>+</sup>CD40<sup>FC</sup> vs Mock\_CD3<sup>+</sup>CD40<sup>FC</sup>, not enriched in G17V\_CD3 vs  
526 Mock\_CD3.

Supplemental Figure 12

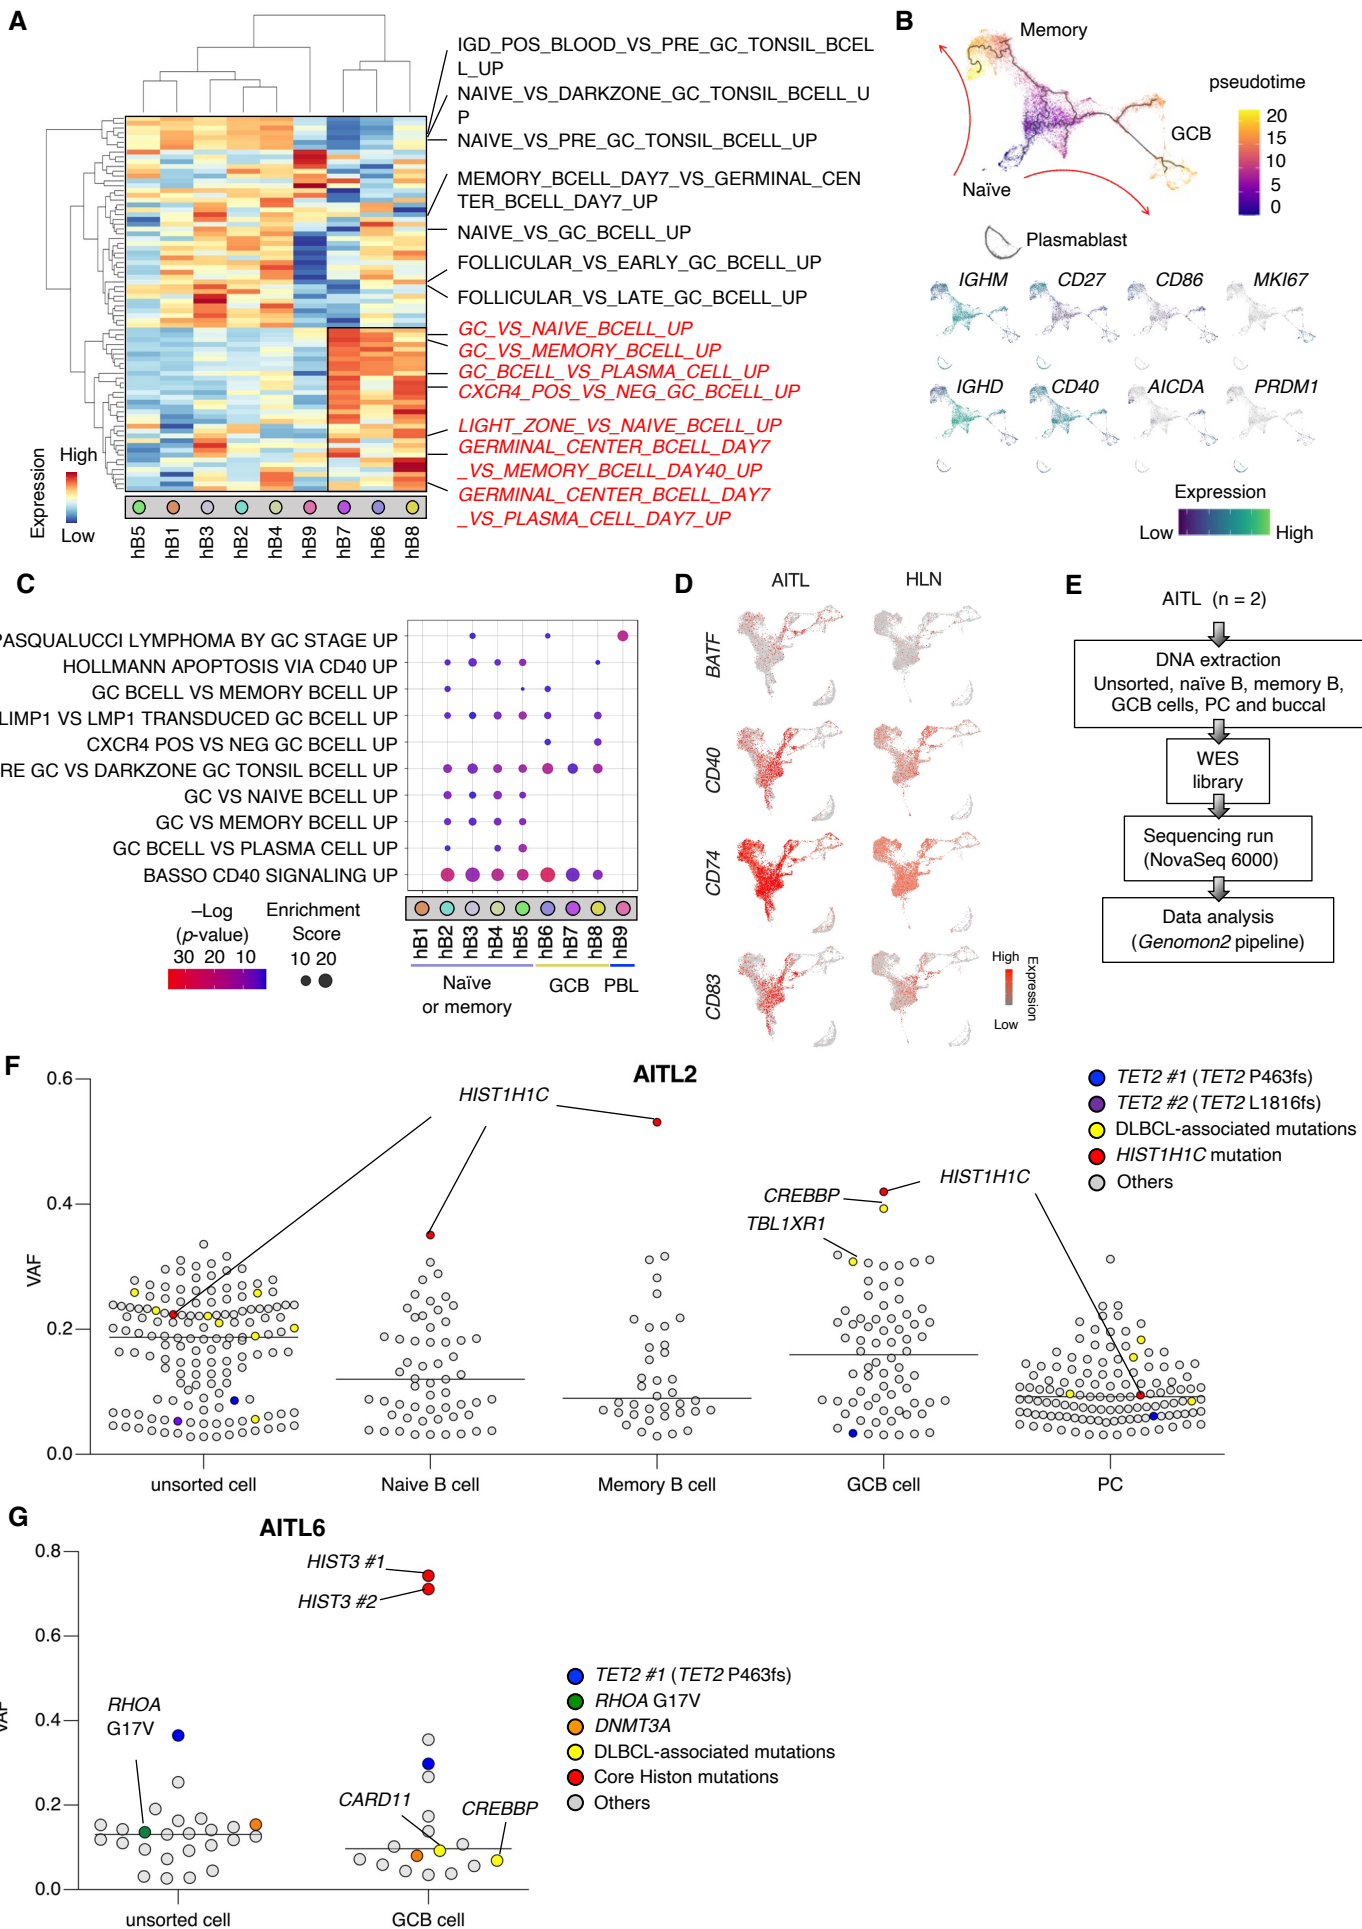

527 **Supplemental Figure 12. Transcriptomic heterogeneity in B-cell subclusters of human AITL**

528 **samples**

529 (A) Heatmap showing pathways differentially enriched at hB1–9 based on GSVA with C7  
530 genes of MsigDB. Gene sets in red indicate pathways enriched in the GCB clusters (hB6–  
531 8).

532 (B) scRNA-seq data of B-cell clusters sorted in silico from integrated data from AITL and  
533 HLN samples. Pseudo-time developmental stages (top) and feature plots for markers  
534 characteristic of B-cell differentiation (bottom). Dark winding lines in the UMAP indicate  
535 the estimated trajectory of the outbreak.

536 (C) Dot plots showing GCB-associated pathways detected by *Metascape* with the signature  
537 module set using upregulated gene lists in AITL compared to HLN. The dot size indicates  
538 the enrichment score. Cut-off, FDR  $p$ -value < 0.25.

539 (D) Feature plots of genes included in the AITL-B-specific gene set.

540 (E) Schema of WES for fractioned B and unsorted cells of AITL. GCB, germinal center B;  
541 PC, plasma cells.

542 Dot plots showing variant allele frequencies (VAF) for each mutation of unsorted cells or  
543 fractioned B cells of AITL2 (F) and AITL6 (G). VAF, variant allele frequency. Mutations  
544 in *TET2*, dark blue or purple; *RHOA* G17V, green; *DNMT3A*, orange; DLBCL-

545

associated mutations, yellow; *Histone* mutations, red; others, grey.

546   **REFERENCES**

- 547   1.    Fujisawa M, Sakata-Yanagimoto M, Nishizawa S, et al. Activation of RHOA-VAV1  
548        signaling in angioimmunoblastic T-cell lymphoma. *Leukemia*. 2018;32(3):694–702.
- 549   2.    Nguyen TB, Sakata-Yanagimoto M, Fujisawa M, et al. Dasatinib Is an Effective  
550        Treatment for Angioimmunoblastic T-cell Lymphoma. *Cancer Research*.  
551        2020;80(9):1875–1884.
- 552   3.    Lee PP, Fitzpatrick DR, Beard C, et al. A Critical Role for Dnmt1 and DNA Methylation  
553        in T Cell Development, Function, and Survival. *Immunity*. 2001;15(5): 63-74.
- 554   4.    Hudson WA, Li Q, Le C, Kersey JH. Xenotransplantation of human lymphoid  
555        malignancies is optimized in mice with multiple immunologic defects. *Leukemia*.  
556        1998;12(12):2029–2033.
- 557   5.    Butler A, Hoffman P, Smibert P, Papalexi E, Satija R. Integrating single-cell transcriptomic  
558        data across different conditions, technologies, and species. *Nature Biotechnology*. 2018;  
559        36(5):411-420.
- 560   6.    Hänzelmann S, Castelo R, Guinney J. GSEA: Gene set variation analysis for microarray  
561        and RNA-Seq data. *BMC Bioinformatics*. 2013;14:7.
- 562   7.    Zhao S, Guo Y, Sheng Q, Shyr Y. Heatmap3: an improved heatmap package with more  
563        powerful and convenient features. *BMC Bioinformatics*. 2014;15(10):P16.

- 564 8. Efremova M, Vento-Tormo M, Teichmann SA, Vento-Tormo R. CellPhoneDB: inferring  
565 cell–cell communication from combined expression of multi-subunit ligand–receptor  
566 complexes. *Nature Protocols*. 2020;15(4):1484-1506.
- 567 9. Vento-Tormo R, Efremova M, Botting RA, et al. Single-cell reconstruction of the early  
568 maternal–fetal interface in humans. *Nature*. 2018; 563(7731):347-353
- 569 10. Dominguez PM, Ghamlouch H, Rosikiewicz W, et al. TET2 deficiency causes germinal  
570 center hyperplasia, impairs plasma cell differentiation and promotes B-cell  
571 lymphomagenesis. *Cancer Discovery*. 2018;CD-18-0657.
- 572 11. Reddy A, Zhang J, Davis NS, et al. Genetic and Functional Drivers of Diffuse Large B Cell  
573 Lymphoma. *Cell*. 2017;171(2):481-494.e15.
- 574 12. Robinson JT, Thorvaldsdóttir H, Winckler W, et al. Integrative genomics viewer. *Nature*  
575 *Biotechnology*. 2011;29(1): 24-6.
- 576 13. Bolotin DA, Poslavsky S, Mitrophanov I, et al. MiXCR: Software for comprehensive  
577 adaptive immunity profiling. *Nature Methods*. 2015;12(5):380-1.
- 578 14. Coffey D. LymphoSeq: Analyze high-throughput sequencing of T and B cell receptors. *R*  
579 *package version 1.24.0*.
- 580 15. Miura F, Enomoto Y, Dairiki R, Ito T. Amplification-free whole-genome bisulfite  
581 sequencing by post-bisulfite adaptor tagging. *Nucleic Acids Research*. 2012;40(17):.

- 582 16. Miura F, Shibata Y, Miura M, et al. Highly efficient single-stranded DNA ligation  
583 technique improves low-input whole-genome bisulfite sequencing by post-bisulfite  
584 adaptor tagging. *Nucleic Acids Research*. 2019;47(15):.
- 585 17. Jiang Y, Ortega-Molina A, Geng H, et al. *CREBBP* Inactivation Promotes the  
586 Development of HDAC3-Dependent Lymphomas. *Cancer Discovery*. 2017;7(1):38–53.
- 587
- 588
